# Supplementary material for: Sexual Selection Halts the Relaxation of Protamine 2 among Rodents
Source: PubMed Central journal article supplement (PMC3244444; doi:10.1371/journal.pone.0029247), 2011-12-21
Supplement: pone.0029247.s007.pdf [file pone.0029247.s007.pdf]

**Figure S7. Cleaved Protamine 2  
Codeml output file M2**

Arvicola sadipus (ASA)  
 Arvicola terrestris (ATE)  
 Clethrionomys glareolus (CGL)  
 Cricetulus griseus (CGR)  
 Chionomys nivalis (CNI)  
 Microtus agrestis (MAG)  
 Microtus arvalis (MAR)  
 Mesocricetus auratus (MAU)  
 Microtus cabrerai (MCA)  
 Microtus gerbei (MGE)  
 Mus musculus musculus (MMU)  
 Phodopus campbelli (PCM)  
 Pitymys duodecimcostatus (PDU)  
 Pitymys lusitanicus (PLU)  
 Phodopus roborovskii (PRO)  
 Phodopus sugorus (PSU)  
 Sigmodon hispidus (SHI)

16 165

```

SHI ATG GTT CGC TAC CGA ACA AGG AGC CCC AGT GAG CAT CTG CAC CAG GGG CCT GGG CAA GAA CAT GGA CGG G-- --- -AA GAA CAG GGG CAA GGG CTA AGC CCA GAG CGC GTG GAG GAC TAT GGG AGG ACA CAC AGG GGC CAC CAC CAC CAC AGA CAC CGT CGC TGC
ASA ATG GTT CGC TAC CGA ATG AGG AGC CCC AGT GAG GGT CCA CAC CAG GGG CCT GGG CAA GAC CAT GGA CCC GAC GAG CAG GGG CAG GGG CAA GGG CTG AGC CCA GAG CGT GTG GAG GAC TAT GGG AGG ACA CAC AGG GGT CAC CAC CAT CAC AGA C-- -GG CGC TGC
ATE ATG GTT CGC TAC CGA ATG AGG AGC CCC AGT GAG CAT CCA CAC CAG GGG CCT GGG CAA GAC CAT GGA CCC GAC GAG CAG GGG CAG GGG CAA GGG YTG AGC CCA GAG CGT GTG GAG GAC TAT GGG AGG ACA CAC AGG GGT CAC CAC CAT CAC AGA C-- -GG CGC TGC
CGL ATG GTT CGC TAC CGA ATA AGG AGC CCC AGT GAG CAT CCA CAC CAG GGG CCT GGG CAA GAC GAT GGA CAT AAA GAC CAG GGG CAG AGG CAA GGG CTG AGC CCA GAG CGT GTG GAG GAC TAT GGG AGG ACA CAT AGG GGT CAC CAC CAT CAC AGA C-- -GG CGC TGC
CNI ATG GTT CGG TAC CGA GTG AGG AGC CCC AGT GAG CAT CCA CAC CAG GGG CCT GGG CAA GAC GAT GGA CAC GAC GAG CAG GGG CAG GGG CAA GGG CTG AGT CCA GAG CGT GTG GAT GAC TAT GGG AGG ACA CAC AGG GGT CAC CAC CAT CAC AGA C-- -GG CGC TGC
MAR ATG GTT CGT TAC CGA ATG AGG AGC CCC AGT GAG CAT CCA CAC CAG GGG CCT GGG CAA GAC GAT GGA CAC GAC GAG CAG GGG CA- --- -A GGG CTG AGT CCA GAG CGT GTG GAG GAC TTG GGG AGG ACA CAC AGG GGT TAC CAC CAT CAC AGA C-- -GG CGC TGC
MCA ATG GTT CGT TAC CGA ATG AGG AGC CCC AGT GAG CAT CCA CAC CAG GGG CCT GGG CAA GAC TAT GGA CAC AAC GAG CAG GGG CAG G-- --- -GG CTG AGT CCA GAG CGT GTG GAG GAT TAT GGG AGG ACA CAC AGG GGT TAC CAC CAT CAC AGA C-- -GG CGC TGC
MGE ATG GTT CGT TAC CGA ATG AGG AGT CCC AGT GAG CAT CCA CAC CAG GGG CCT GGG CAA GAC AAT AGA CAC RAC GAG CAG GGG CAG GGG CAA GGG CTG AGT CCA GAG CGT GTG GAG GAC TAT GGG AGG ACA CAC AGG GGT TAC CAC CAT CAC AGA C-- -GG CGC TGC
MAG ATG GTT CGT TAC CGA ATG AGG AGC CCC AGT GAG CAT CCA CGC CAG GGG CCT GGG CAA GAC GAT GGA CGT GAC GAG CAG GGG CAG GGG CAA GGG CTG AGT CCA GAG CGT GTG GAG GAC TAT GGG AGG ACA CAC AGG GGT TAC CAC CAT CAC AGA C-- -GG CGC TGC
PDU ATG GTT CGT TAC CGA ATG AGG AGT CCC AGT GAG CAT CCA CAC CAG GGG CCT GGG CAA GAC AAT AGA CAC GAC GAG CAG GGG CAG GGG CAA GGG CTG AGT CCA GAG TGT GTG GAG GAC TAT GGG AGG ACA CAC AGG GGT TAC CAC CAT CAC AGA C-- -GG CGC TGC
PLU ATG GTT CGT TAC CGA ATG AGG AGT CCC AGT GAG CAT CCA CAC CAG GGG CCT GGG CAA GAC AAT AGA CAC GAC GAA CAG GGG CAG GGG CAA GGG CTG AGT CCA GAG CGT GTG GAR GAC TAT GGG AGG ACA CAC AGG GGT TAC CAY CAT CAC AGA C-- -GG CGC TGC
MAU ATG GTT CGT TAC CGA ATG AGG AGC CCC AGT GAG CGT CCG CAC CAG GGG CCT GGG CAA GAA CAT GGA CGT GAA GAG CAA GGG CAG GGG CAA GGG TTG AGC CCA GAG CGT GTG GAG GAC TAT GGG AGG ACA CAC AGG GGC CAA CAC CAC CAC AGA CGT CGC TGC ---
PSU ATG GTT CGT TAC CGA ATG AGA AGC CCC AGT GAG CGT CCA CAC CAG GGG CAC GGG CAA GAA CAT G-- --- --- -AA GAG CAG GGG CAA GGG TTC AGC CCA GAG CAT GTG GAG GAC TAT GGG AGG ACA CAT AGG TGC CAC CAC CAC CAC AGA CAC CGT CGC TGC
PRO ATG GTT CGT TAC CGA GTG AGA AGC CCC AGT GAG CGT CCA CGC AAG GGG CCT GGG CAA GAA CAT G-- --- --- -AA GAT CAG GGG CAA GGG TTG AGC CCA GAG CAT GTG GAG GAC TAT GGG AGG ACA CAT AGG GGC CAC CAC CAT CAC AGA CAC CGT CGC TGC
PCM ATG GTT CGT TAC CGA ATG AGA AGC CCC AGT GAG CGT CCA CAC CAG GGG CAC GGG CAA GAA CAT G-- --- --- -AA GAG CAG GGG CAA GGG TTC AGC CCA GAG CAT GTG GAG GAC TAT GGG AGG ACA CAT AGG TGC CAC CAC CAC CAC AGA CAC CGT CGC TGC
MMU ATG GTT CGC TAC CGA ATG AGG AGC CCC AGT GAG GGT CCG CAC CAG GGG CCT GGA CAA GAC CAT GAA CGC GAG GAG CAG GGG CAG GGG CAA GGG CTG AGC CCA GAG CGC GTA GAG GAC TAT GGG AGG ACA CAC AGG GGC CAC CAC CAC CAC AGA CAC AGG CGC TGC
  
```

Printing out site pattern counts

16 156 P

```

SHI --- -AA ACA ACA AGA AGC AGC AGG AGG AGT ATG CAA CAA CAC CAC CAC CAC CAC CAG CAG CAT CAT CCA CCC CCT CGA CGC CGC CGC CGG CGT CTA CTG G-- GAA GAA GAC GAG GAG GGA GGC GGG GGG GGG GGG GTG GTT TAC TAT TGC
ASA GAG CAG ACA ATG AGA AGC AGC AGG AGG AGT ATG CAA CAA C-- CAC CAC CAC CAC CAC CAT CAG CAG CAT GGT CCA CCC CCT CGA CGC CGC CGT CCC -GG CTG CCA GAC GAC GGG GAC GAG GAG GGA GGT GGG GGG GGG GGG GTG GTT TAC TAT TGC
ATE GAG CAG ACA ATG AGA AGC AGC AGG AGG AGT ATG CAA CAA C-- CAC CAC CAC CAC CAC CAT CAG CAG CAT CAT CCA CCC CCT CGA CGC CGC CGT CCC -GG YTG CCA GAC GAC GGG GAC GAG GAG GGA GGT GGG GGG GGG GGG GTG GTT TAC TAT TGC
CGL GAC CAG ACA ATA AGA AGC AGC AGG AGG AGT ATG CAA CAA C-- CAC CAC CAC CAC CAT CAT CAG CAG GAT CAT CCA CCC CCT CGA CGC CGC CGT CAT -GG CTG CCA AAA GAC GGG GAC GAG GAG GGA GGT AGG GGG GGG GGG GTG GTT TAC TAT TGC
CNI GAG CAG ACA GTG AGA AGC AGT AGG AGG AGT ATG CAA CAA C-- CAC CAC CAC CAT CAC CAT CAG CAG GAT CAT CCA CCC CCT CGA CGC CGC CGT CAT -GG CTG CCA GAC GAC GGG GAC GAG GAT GGA GGT GGG GGG GGG GGG GTG GTT TAC TAT TGC
  
```

MAR GAG CAG ACA ATG AGA AGC AGT AGG AGG AGT ATG --A CAA C-- CAC CAC TAC CAC CAC CAT CA- CAG GAT CAT CCA CCC CCT CGA CGC CGT CGT CAC -GG CTG CCA GAC GAC GGG GAC GAG GAG GGA GGT --- GGG GGG GGG GTG GTT TAC TTG TGC  
MCA GAG CAG ACA ATG AGA AGC AGT AGG AGG AGT ATG --- CAA C-- CAC CAC TAC CAC CAC CAT CAG CAG TAT CAT CCA CCC CCT CGA CGC CGT CGT CAC -GG CTG CCA AAC GAC GGG GAT GAG GAG GGA GGT G-- -GG GGG GGG GTG GTT TAC TAT TGC  
MGE GAG CAG ACA ATG AGA AGT AGT AGG AGG AGT ATG CAA CAA C-- CAC CAC TAC CAC CAC CAT CAG CAG AAT CAT CCA CCC CCT CGA CGC CGT CGT CAC -GG CTG CCA RAC GAC GGG GAC GAG GAG AGA GGT GGG GGG GGG GTG GTT TAC TAT TGC  
MAG GAG CAG ACA ATG AGA AGC AGT AGG AGG AGT ATG CAA CAA C-- CAC CGC TAC CAC CAC CAT CAG CAG GAT CAT CCA CCC CCT CGA CGC CGT CGT CAG -GG CTG CCA GAC GAC GGG GAC GAG GAG GGA GGT GGG GGG GGG GTG GTT TAC TAT TGC  
PDU GAG CAG ACA ATG AGA AGT AGT AGG AGG AGT ATG CAA CAA C-- CAC CAC TAC CAC CAC CAT CAG CAG AAT CAT CCA CCC CCT CGA CGC CGT TGT CAC -GG CTG CCA GAC GAC GGG GAC GAG GAG AGA GGT GGG GGG GGG GTG GTT TAC TAT TGC  
PLU GAA CAG ACA ATG AGA AGT AGT AGG AGG AGT ATG CAA CAA C-- CAY CAC TAC CAC CAC CAT CAG CAG AAT CAT CCA CCC CCT CGA CGC CGT CGT CAC -GG CTG CCA GAC GAC GGG GAC GAG GAR AGA GGT GGG GGG GGG GTG GTT TAC TAT TGC  
MAU GAG CAA ACA ATG AGA AGC AGC AGG AGG AGT ATG CAA CAA CGT CAC CAC CAA CAC CAC CAG CAG CAT CGT CCA CCC CCT CGA TGC CGT CGT CGT CGC TTG CCG GAA GAA GGG GAC GAG GAG GGA GGC GGG GGG GGG GTG GTT TAC TAT ---  
PSU --- -AA ACA ATG AGA AGC AGC AGA AGG AGT ATG CAA CAA CAC CAC CAC CAC CAC CAG CAG CAT CGT CCA CCC CAC CGA CGC CGT CAT --- CGT TTC CCA --- GAA GAG GAC GAG GAG G-- TGC GGG GGG GGG GGG GTG GTT TAC TAT TGC  
PRO --- -AA ACA GTG AGA AGC AGC AGA AGG AGT ATG CAA CAA CAC CAC CGC CAC CAC CAT CAT CAG AAG CAT CGT CCA CCC CCT CGA CGC CGT CAT --- CGT TTG CCA --- GAA GAT GAC GAG GAG G-- GGC GGG GGG GGG GTG GTT TAC TAT TGC  
PCM --- -AA ACA ATG AGA AGC AGC AGA AGG AGT ATG CAA CAA CAC CAC CAC CAC CAC CAG CAG CAT CGT CCA CCC CAC CGA CGC CGT CAT --- CGT TTC CCA --- GAA GAG GAC GAG GAG G-- TGC GGG GGG GGG GGG GTG GTT TAC TAT TGC  
MMU GAG CAG ACA ATG AGA AGC AGC AGG AGG AGT ATG CAA CAA CAC CAC CAC CAC CAC CAG CAG CAT GGT CCA CCC CCT CGA CGC CGC CGC CGC AGG CTG CCG GAG GAC GGG GAC GAG GAG GAA GGC GGG GGG GGA GGG GTA GTT TAC TAT TGC

1 1 1 1 1 1 1 1 2 1 1 1 1 1 1  
1 1 1 1 1 1 1 1 1 1 1 1 1 1 1  
1 1 1 1 1 1 1 1 2 1 1 1 1 1 1  
1 2 1 1 1 1 1

CODONML (in paml version 4.4d, March 2011) 1.phy  
Model: One dN/dS ratio for branches  
Codon frequency model: Fcodon  
Site-class models: PositiveSelection  
ns = 16 ls = 55

Codon usage in sequences

|     |     |   |   |   |   |   |   |     |     |   |   |   |   |   |   |     |     |   |   |   |   |   |   |     |     |     |   |   |   |   |   |
|-----|-----|---|---|---|---|---|---|-----|-----|---|---|---|---|---|---|-----|-----|---|---|---|---|---|---|-----|-----|-----|---|---|---|---|---|
| Phe | TTT | 0 | 0 | 0 | 0 | 0 | 0 | Ser | TCT | 0 | 0 | 0 | 0 | 0 | 0 | Tyr | TAT | 1 | 1 | 1 | 1 | 1 | 0 | Cys | TGT | 0   | 0 | 0 | 0 | 0 | 0 |
|     | TTC | 0 | 0 | 0 | 0 | 0 | 0 |     | TCC | 0 | 0 | 0 | 0 | 0 | 0 |     | TAC | 1 | 1 | 1 | 1 | 1 | 2 |     | TGC | 1   | 1 | 1 | 1 | 1 | 1 |
| Leu | TTA | 0 | 0 | 0 | 0 | 0 | 0 |     | TCA | 0 | 0 | 0 | 0 | 0 | 0 | *** | TAA | 0 | 0 | 0 | 0 | 0 | 0 | *** | TGA | 0   | 0 | 0 | 0 | 0 | 0 |
|     | TTG | 0 | 0 | 0 | 0 | 0 | 1 |     | TCG | 0 | 0 | 0 | 0 | 0 | 0 |     | TAG | 0 | 0 | 0 | 0 | 0 | 0 |     | Trp | TGG | 0 | 0 | 0 | 0 | 0 |
| Leu | CTT | 0 | 0 | 0 | 0 | 0 | 0 | Pro | CCT | 1 | 1 | 1 | 1 | 1 | 1 | His | CAT | 2 | 2 | 3 | 4 | 3 | 2 | Arg | CGT | 1   | 1 | 1 | 1 | 1 | 2 |
|     | CTC | 0 | 0 | 0 | 0 | 0 | 0 |     | CCC | 1 | 2 | 2 | 1 | 1 | 1 |     | CAC | 7 | 5 | 5 | 4 | 5 | 5 |     | CGC | 3   | 2 | 2 | 2 | 1 | 1 |
|     | CTA | 1 | 0 | 0 | 0 | 0 | 0 |     | CCA | 1 | 2 | 2 | 2 | 2 | 2 | Gln | CAA | 2 | 2 | 2 | 2 | 2 | 1 |     | CGA | 1   | 1 | 1 | 1 | 1 | 1 |
|     | CTG | 1 | 1 | 0 | 1 | 1 | 1 |     | CCG | 0 | 0 | 0 | 0 | 0 | 0 |     | CAG | 2 | 3 | 3 | 3 | 3 | 2 |     | CGG | 1   | 0 | 0 | 0 | 1 | 0 |
| Ile | ATT | 0 | 0 | 0 | 0 | 0 | 0 | Thr | ACT | 0 | 0 | 0 | 0 | 0 | 0 | Asn | AAT | 0 | 0 | 0 | 0 | 0 | 0 | Ser | AGT | 1   | 1 | 1 | 1 | 2 | 2 |
|     | ATC | 0 | 0 | 0 | 0 | 0 | 0 |     | ACC | 0 | 0 | 0 | 0 | 0 | 0 |     | AAC | 0 | 0 | 0 | 0 | 0 | 0 |     | AGC | 2   | 2 | 2 | 2 | 1 | 1 |
|     | ATA | 0 | 0 | 0 | 1 | 0 | 0 |     | ACA | 2 | 1 | 1 | 1 | 1 | 1 | Lys | AAA | 0 | 0 | 0 | 1 | 0 | 0 | Arg | AGA | 1   | 1 | 1 | 1 | 1 | 1 |
| Met | ATG | 1 | 2 | 2 | 1 | 1 | 2 |     | ACG | 0 | 0 | 0 | 0 | 0 | 0 |     | AAG | 0 | 0 | 0 | 0 | 0 | 0 |     | AGG | 3   | 3 | 3 | 4 | 3 | 3 |
| Val | GTT | 1 | 1 | 1 | 1 | 1 | 1 | Ala | GCT | 0 | 0 | 0 | 0 | 0 | 0 | Asp | GAT | 0 | 0 | 0 | 1 | 2 | 1 | Gly | GGT | 0   | 2 | 1 | 1 | 1 | 1 |
|     | GTC | 0 | 0 | 0 | 0 | 0 | 0 |     | GCC | 0 | 0 | 0 | 0 | 0 | 0 |     | GAC | 1 | 3 | 3 | 3 | 3 | 3 |     | GGC | 1   | 0 | 0 | 0 | 0 | 0 |
|     | GTA | 0 | 0 | 0 | 0 | 0 | 0 |     | GCA | 0 | 0 | 0 | 0 | 0 | 0 | Glu | GAA | 2 | 0 | 0 | 0 | 0 | 0 |     | GGA | 1   | 1 | 1 | 1 | 1 | 1 |
|     | GTG | 1 | 1 | 1 | 1 | 2 | 1 |     | GCG | 0 | 0 | 0 | 0 | 0 | 0 |     | GAG | 3 | 4 | 4 | 3 | 3 | 4 |     | GGG | 5   | 6 | 6 | 5 | 6 | 5 |

|     |     |   |   |   |   |   |   |     |     |   |   |   |   |   |   |     |     |   |   |   |   |   |   |     |     |     |   |   |   |   |   |
|-----|-----|---|---|---|---|---|---|-----|-----|---|---|---|---|---|---|-----|-----|---|---|---|---|---|---|-----|-----|-----|---|---|---|---|---|
| Phe | TTT | 0 | 0 | 0 | 0 | 0 | 0 | Ser | TCT | 0 | 0 | 0 | 0 | 0 | 0 | Tyr | TAT | 2 | 1 | 1 | 1 | 1 | 1 | Cys | TGT | 0   | 0 | 0 | 1 | 0 | 0 |
|     | TTC | 0 | 0 | 0 | 0 | 0 | 0 |     | TCC | 0 | 0 | 0 | 0 | 0 | 0 |     | TAC | 2 | 2 | 2 | 2 | 2 | 1 |     | TGC | 1   | 1 | 1 | 1 | 1 | 1 |
| Leu | TTA | 0 | 0 | 0 | 0 | 0 | 0 |     | TCA | 0 | 0 | 0 | 0 | 0 | 0 | *** | TAA | 0 | 0 | 0 | 0 | 0 | 0 | *** | TGA | 0   | 0 | 0 | 0 | 0 | 0 |
|     | TTG | 0 | 0 | 0 | 0 | 0 | 1 |     | TCG | 0 | 0 | 0 | 0 | 0 | 0 |     | TAG | 0 | 0 | 0 | 0 | 0 | 0 |     | Trp | TGG | 0 | 0 | 0 | 0 | 0 |
| Leu | CTT | 0 | 0 | 0 | 0 | 0 | 0 | Pro | CCT | 1 | 1 | 1 | 1 | 1 | 1 | His | CAT | 2 | 2 | 2 | 2 | 2 | 1 | Arg | CGT | 2   | 2 | 3 | 1 | 2 | 5 |
|     | CTC | 0 | 0 | 0 | 0 | 0 | 0 |     | CCC | 1 | 1 | 1 | 1 | 1 | 1 |     | CAC | 5 | 5 | 3 | 5 | 4 | 5 |     | CGC | 1   | 1 | 2 | 1 | 1 | 1 |
|     | CTA | 0 | 0 | 0 | 0 | 0 | 0 |     | CCA | 2 | 2 | 2 | 2 | 2 | 1 | Gln | CAA | 1 | 2 | 2 | 2 | 2 | 4 |     | CGA | 1   | 1 | 1 | 1 | 1 | 1 |
|     | CTG | 1 | 1 | 1 | 1 | 1 | 0 |     | CCG | 0 | 0 | 0 | 0 | 0 | 1 |     | CAG | 3 | 3 | 3 | 3 | 3 | 2 |     | CGG | 0   | 0 | 0 | 0 | 0 | 0 |

|     |     |   |   |   |   |   |   |     |     |   |   |   |   |   |   |     |     |   |   |   |   |   |   |     |     |   |   |   |   |   |   |
|-----|-----|---|---|---|---|---|---|-----|-----|---|---|---|---|---|---|-----|-----|---|---|---|---|---|---|-----|-----|---|---|---|---|---|---|
| Ile | ATT | 0 | 0 | 0 | 0 | 0 | 0 | Thr | ACT | 0 | 0 | 0 | 0 | 0 | 0 | Asn | AAT | 0 | 1 | 0 | 1 | 1 | 0 | Ser | AGT | 2 | 3 | 2 | 3 | 3 | 1 |
|     | ATC | 0 | 0 | 0 | 0 | 0 | 0 |     | ACC | 0 | 0 | 0 | 0 | 0 | 0 |     | AAC | 1 | 0 | 0 | 0 | 0 | 0 |     | AGC | 1 | 0 | 1 | 0 | 0 | 2 |
|     | ATA | 0 | 0 | 0 | 0 | 0 | 0 |     | ACA | 1 | 1 | 1 | 1 | 1 | 1 | Lys | AAA | 0 | 0 | 0 | 0 | 0 | 0 | Arg | AGA | 1 | 2 | 1 | 2 | 2 | 1 |
| Met | ATG | 2 | 2 | 2 | 2 | 2 | 2 |     | ACG | 0 | 0 | 0 | 0 | 0 | 0 |     | AAG | 0 | 0 | 0 | 0 | 0 | 0 |     | AGG | 3 | 3 | 3 | 3 | 3 |   |

|     |     |   |   |   |   |   |   |     |     |   |   |   |   |   |   |     |     |   |   |   |   |   |   |     |     |   |   |   |   |   |   |
|-----|-----|---|---|---|---|---|---|-----|-----|---|---|---|---|---|---|-----|-----|---|---|---|---|---|---|-----|-----|---|---|---|---|---|---|
| Val | GTT | 1 | 1 | 1 | 1 | 1 | 1 | Ala | GCT | 0 | 0 | 0 | 0 | 0 | 0 | Asp | GAT | 1 | 0 | 1 | 0 | 0 | 0 | Gly | GGT | 1 | 1 | 1 | 1 | 1 | 0 |
|     | GTC | 0 | 0 | 0 | 0 | 0 | 0 |     | GCC | 0 | 0 | 0 | 0 | 0 | 0 |     | GAC | 1 | 2 | 3 | 3 | 3 | 1 |     | GGC | 0 | 0 | 0 | 0 | 0 | 1 |
|     | GTA | 0 | 0 | 0 | 0 | 0 | 0 |     | GCA | 0 | 0 | 0 | 0 | 0 | 0 | Glu | GAA | 0 | 0 | 0 | 0 | 1 | 2 |     | GGA | 1 | 0 | 1 | 0 | 0 | 1 |
|     | GTG | 1 | 1 | 1 | 1 | 1 | 1 |     | GCG | 0 | 0 | 0 | 0 | 0 | 0 |     | GAG | 4 | 4 | 4 | 4 | 2 | 4 |     | GGG | 4 | 6 | 6 | 6 | 6 | 6 |

|     |     |   |   |   |   |     |     |   |   |   |   |     |     |   |   |   |   |     |     |   |   |   |   |
|-----|-----|---|---|---|---|-----|-----|---|---|---|---|-----|-----|---|---|---|---|-----|-----|---|---|---|---|
| Phe | TTT | 0 | 0 | 0 | 0 | Ser | TCT | 0 | 0 | 0 | 0 | Tyr | TAT | 1 | 1 | 1 | 1 | Cys | TGT | 0 | 0 | 0 | 0 |
|     | TTC | 1 | 0 | 1 | 0 |     | TCC | 0 | 0 | 0 | 0 |     | TAC | 1 | 1 | 1 | 1 |     | TGC | 2 | 1 | 2 | 1 |
| Leu | TTA | 0 | 0 | 0 | 0 |     | TCA | 0 | 0 | 0 | 0 | *** | TAA | 0 | 0 | 0 | 0 | *** | TGA | 0 | 0 | 0 | 0 |
|     | TTG | 0 | 1 | 0 | 0 |     | TCG | 0 | 0 | 0 | 0 |     | TAG | 0 | 0 | 0 | 0 |     | TGG | 0 | 0 | 0 | 0 |

|     |     |   |   |   |   |     |     |   |   |   |   |     |     |   |   |   |   |     |     |   |   |   |   |
|-----|-----|---|---|---|---|-----|-----|---|---|---|---|-----|-----|---|---|---|---|-----|-----|---|---|---|---|
| Leu | CTT | 0 | 0 | 0 | 0 | Pro | CCT | 0 | 1 | 0 | 1 | His | CAT | 3 | 4 | 3 | 1 | Arg | CGT | 3 | 3 | 3 | 0 |
|     | CTC | 0 | 0 | 0 | 0 |     | CCC | 1 | 1 | 1 | 1 |     | CAC | 7 | 4 | 7 | 7 |     | CGC | 1 | 2 | 1 | 4 |
|     | CTA | 0 | 0 | 0 | 0 |     | CCA | 2 | 2 | 2 | 1 | Gln | CAA | 2 | 2 | 2 | 2 |     | CGA | 1 | 1 | 1 | 1 |
|     | CTG | 0 | 0 | 0 | 1 |     | CCG | 0 | 0 | 0 | 1 |     | CAG | 2 | 1 | 2 | 3 |     | CGG | 0 | 0 | 0 | 0 |

|     |     |   |   |   |   |     |     |   |   |   |   |     |     |   |   |   |   |     |     |   |   |   |   |
|-----|-----|---|---|---|---|-----|-----|---|---|---|---|-----|-----|---|---|---|---|-----|-----|---|---|---|---|
| Ile | ATT | 0 | 0 | 0 | 0 | Thr | ACT | 0 | 0 | 0 | 0 | Asn | AAT | 0 | 0 | 0 | 0 | Ser | AGT | 1 | 1 | 1 | 1 |
|     | ATC | 0 | 0 | 0 | 0 |     | ACC | 0 | 0 | 0 | 0 |     | AAC | 0 | 0 | 0 | 0 |     | AGC | 2 | 2 | 2 | 2 |
|     | ATA | 0 | 0 | 0 | 0 |     | ACA | 1 | 1 | 1 | 1 | Lys | AAA | 0 | 0 | 0 | 0 | Arg | AGA | 2 | 2 | 2 | 1 |
| Met | ATG | 2 | 1 | 2 | 2 |     | ACG | 0 | 0 | 0 | 0 |     | AAG | 0 | 1 | 0 | 0 |     | AGG | 2 | 2 | 2 | 4 |

|     |     |   |   |   |   |     |     |   |   |   |   |     |     |   |   |   |   |     |     |   |   |   |   |
|-----|-----|---|---|---|---|-----|-----|---|---|---|---|-----|-----|---|---|---|---|-----|-----|---|---|---|---|
| Val | GTT | 1 | 1 | 1 | 1 | Ala | GCT | 0 | 0 | 0 | 0 | Asp | GAT | 0 | 1 | 0 | 0 | Gly | GGT | 0 | 0 | 0 | 1 |
|     | GTC | 0 | 0 | 0 | 0 |     | GCC | 0 | 0 | 0 | 0 |     | GAC | 1 | 1 | 1 | 2 |     | GGC | 0 | 1 | 0 | 1 |
|     | GTA | 0 | 0 | 0 | 1 |     | GCA | 0 | 0 | 0 | 0 | Glu | GAA | 1 | 1 | 1 | 1 |     | GGA | 0 | 0 | 0 | 1 |
|     | GTG | 1 | 2 | 1 | 0 |     | GCG | 0 | 0 | 0 | 0 |     | GAG | 4 | 3 | 4 | 5 |     | GGG | 5 | 5 | 5 | 5 |

Codon position x base (3x4) table for each sequence.

#1: SHI  
position 1: T:0.05769 C:0.46154 A:0.19231 G:0.28846  
position 2: T:0.09615 C:0.09615 A:0.40385 G:0.40385  
position 3: T:0.13462 C:0.32692 A:0.21154 G:0.32692  
Average T:0.09615 C:0.29487 A:0.26923 G:0.33974

#2: ASA  
position 1: T:0.05660 C:0.41509 A:0.18868 G:0.33962  
position 2: T:0.09434 C:0.11321 A:0.39623 G:0.39623  
position 3: T:0.16981 C:0.30189 A:0.15094 G:0.37736  
Average T:0.10692 C:0.27673 A:0.24528 G:0.37107

#3: ATE  
position 1: T:0.05769 C:0.42308 A:0.19231 G:0.32692  
position 2: T:0.07692 C:0.11538 A:0.42308 G:0.38462  
position 3: T:0.17308 C:0.30769 A:0.15385 G:0.36538  
Average T:0.10256 C:0.28205 A:0.25641 G:0.35897

#4: CGL  
position 1: T:0.05660 C:0.41509 A:0.22642 G:0.30189  
position 2: T:0.09434 C:0.09434 A:0.43396 G:0.37736  
position 3: T:0.20755 C:0.26415 A:0.18868 G:0.33962

Average T:0.11950 C:0.25786 A:0.28302 G:0.33962

#5: CNI  
position 1: T:0.05660 C:0.41509 A:0.16981 G:0.35849  
position 2: T:0.09434 C:0.09434 A:0.43396 G:0.37736  
position 3: T:0.22642 C:0.24528 A:0.15094 G:0.37736  
Average T:0.12579 C:0.25157 A:0.25157 G:0.37107

#6: MAR  
position 1: T:0.08000 C:0.38000 A:0.20000 G:0.34000  
position 2: T:0.12000 C:0.10000 A:0.40000 G:0.38000  
position 3: T:0.20000 C:0.28000 A:0.14000 G:0.38000  
Average T:0.13333 C:0.25333 A:0.24667 G:0.36667

#7: MCA  
position 1: T:0.10000 C:0.40000 A:0.22000 G:0.28000  
position 2: T:0.10000 C:0.10000 A:0.44000 G:0.36000  
position 3: T:0.24000 C:0.26000 A:0.14000 G:0.36000  
Average T:0.14667 C:0.25333 A:0.26667 G:0.33333

#8: MGE  
position 1: T:0.07692 C:0.40385 A:0.23077 G:0.28846  
position 2: T:0.09615 C:0.09615 A:0.42308 G:0.38462  
position 3: T:0.23077 C:0.23077 A:0.15385 G:0.38462  
Average T:0.13462 C:0.24359 A:0.26923 G:0.35256

#9: MAG  
position 1: T:0.07547 C:0.39623 A:0.18868 G:0.33962  
position 2: T:0.09434 C:0.09434 A:0.39623 G:0.41509  
position 3: T:0.22642 C:0.24528 A:0.15094 G:0.37736  
Average T:0.13208 C:0.24528 A:0.24528 G:0.37736

#10: PDU  
position 1: T:0.09434 C:0.37736 A:0.22642 G:0.30189  
position 2: T:0.09434 C:0.09434 A:0.43396 G:0.37736  
position 3: T:0.22642 C:0.24528 A:0.15094 G:0.37736  
Average T:0.13836 C:0.23899 A:0.27044 G:0.35220

#11: PLU  
position 1: T:0.07843 C:0.39216 A:0.23529 G:0.29412  
position 2: T:0.09804 C:0.09804 A:0.41176 G:0.39216  
position 3: T:0.23529 C:0.23529 A:0.17647 G:0.35294  
Average T:0.13725 C:0.24183 A:0.27451 G:0.34641

#12: MAU  
position 1: T:0.07407 C:0.42593 A:0.18519 G:0.31481  
position 2: T:0.09259 C:0.09259 A:0.38889 G:0.42593  
position 3: T:0.18519 C:0.24074 A:0.20370 G:0.37037  
Average T:0.11728 C:0.25309 A:0.25926 G:0.37037

#13: PSU  
position 1: T:0.10000 C:0.44000 A:0.20000 G:0.26000  
position 2: T:0.10000 C:0.08000 A:0.44000 G:0.38000  
position 3: T:0.18000 C:0.32000 A:0.18000 G:0.32000  
Average T:0.12667 C:0.28000 A:0.27333 G:0.32000

#14: PRO  
position 1: T:0.08000 C:0.42000 A:0.20000 G:0.30000

```

position 2:  T:0.10000  C:0.10000  A:0.40000  G:0.40000
position 3:  T:0.24000  C:0.26000  A:0.18000  G:0.32000
Average     T:0.14000  C:0.26000  A:0.26000  G:0.34000

```

```

#15: PCM
position 1:  T:0.10000  C:0.44000  A:0.20000  G:0.26000
position 2:  T:0.10000  C:0.08000  A:0.44000  G:0.38000
position 3:  T:0.18000  C:0.32000  A:0.18000  G:0.32000
Average     T:0.12667  C:0.28000  A:0.27333  G:0.32000

```

```

#16: MMU
position 1:  T:0.05455  C:0.41818  A:0.20000  G:0.32727
position 2:  T:0.09091  C:0.09091  A:0.41818  G:0.40000
position 3:  T:0.10909  C:0.34545  A:0.16364  G:0.38182
Average     T:0.08485  C:0.28485  A:0.26061  G:0.36970

```

Sums of codon usage counts

|       |     |    |       |     |    |       |     |    |       |     |    |
|-------|-----|----|-------|-----|----|-------|-----|----|-------|-----|----|
| Phe F | TTT | 0  | Ser S | TCT | 0  | Tyr Y | TAT | 16 | Cys C | TGT | 1  |
|       | TTC | 2  |       | TCC | 0  |       | TAC | 22 |       | TGC | 18 |
| Leu L | TTA | 0  |       | TCA | 0  | *** * | TAA | 0  | *** * | TGA | 0  |
|       | TTG | 3  |       | TCG | 0  |       | TAG | 0  | Trp W | TGG | 0  |
| Leu L | CTT | 0  | Pro P | CCT | 14 | His H | CAT | 38 | Arg R | CGT | 31 |
|       | CTC | 0  |       | CCC | 18 |       | CAC | 83 |       | CGC | 26 |
|       | CTA | 1  |       | CCA | 29 | Gln Q | CAA | 32 |       | CGA | 16 |
|       | CTG | 11 |       | CCG | 2  |       | CAG | 41 |       | CGG | 2  |
| Ile I | ATT | 0  | Thr T | ACT | 0  | Asn N | AAT | 3  | Ser S | AGT | 26 |
|       | ATC | 0  |       | ACC | 0  |       | AAC | 1  |       | AGC | 22 |
|       | ATA | 1  |       | ACA | 17 | Lys K | AAA | 1  | Arg R | AGA | 22 |
| Met M | ATG | 28 |       | ACG | 0  |       | AAG | 1  |       | AGG | 47 |
| Val V | GTT | 16 | Ala A | GCT | 0  | Asp D | GAT | 7  | Gly G | GGT | 12 |
|       | GTC | 0  |       | GCC | 0  |       | GAC | 34 |       | GGC | 4  |
|       | GTA | 1  |       | GCA | 0  | Glu E | GAA | 9  |       | GGA | 10 |
|       | GTG | 17 |       | GCG | 0  |       | GAG | 59 |       | GGG | 87 |

(Ambiguity data are not used in the counts.)

Codon position x base (3x4) table, overall

```

position 1:  T:0.07461  C:0.41396  A:0.20337  G:0.30806
position 2:  T:0.09627  C:0.09627  A:0.41757  G:0.38989
position 3:  T:0.19735  C:0.27677  A:0.16727  G:0.35860
Average     T:0.12274  C:0.26233  A:0.26274  G:0.35219

```

Codon frequencies under model, for use in evolver (TTT TTC TTA TTG ... GGG):

```

0.00000000 0.00230681 0.00000000 0.00370157
0.00000000 0.00000000 0.00000000 0.00000000
0.01845444 0.02537486 0.00000000 0.00000000
0.00115340 0.02076125 0.00000000 0.00000000
0.00000000 0.00000000 0.00119466 0.01398739
0.01660824 0.02135345 0.03464509 0.00237261
0.04568127 0.09977750 0.04208581 0.04888368
0.03677538 0.03084387 0.01911453 0.00256780

```

0.00000000 0.00000000 0.00116130 0.03229527  
0.00000000 0.00000000 0.01974209 0.00000000  
0.00346021 0.00118575 0.00126803 0.00115340  
0.02998847 0.02537486 0.02554859 0.05853633  
0.01880125 0.00000000 0.00118328 0.01997633  
0.00000000 0.00000000 0.00000000 0.00000000  
0.00822555 0.04109478 0.01183489 0.07033544  
0.01410094 0.00470031 0.01183276 0.11055658

Nei & Gojobori 1986. dN/dS (dN, dS)  
(Pairwise deletion)  
(Note: This matrix is not used in later ML. analysis.  
Use runmode = -2 for ML pairwise comparison.)

SHI  
ASA 0.2593 (0.0676 0.2608)  
ATE 0.2119 (0.0496 0.2340)-1.0000 (0.0165 0.0000)  
CGL 0.2534 (0.0673 0.2657) 1.2547 (0.0759 0.0605) 0.9248 (0.0590 0.0638)  
CNI 0.2020 (0.0787 0.3896) 0.5468 (0.0500 0.0914) 0.3454 (0.0333 0.0964) 0.3001 (0.0540 0.1801)  
MAR 0.2742 (0.0976 0.3560) 0.9716 (0.0621 0.0640) 0.6558 (0.0444 0.0676) 0.4574 (0.0620 0.1354) 0.6847 (0.0438 0.0640)  
MCA 0.1822 (0.0766 0.4202) 0.5245 (0.0526 0.1003) 0.3294 (0.0351 0.1064) 0.2445 (0.0435 0.1777) 0.4338 (0.0436 0.1095) 1.0736 (0.0353 0.0329)  
MGE 0.2117 (0.0813 0.3843) 0.5376 (0.0508 0.0945) 0.3389 (0.0338 0.0998) 0.3911 (0.0505 0.1679) 0.4447 (0.0421 0.0946) 1.0936 (0.0355 0.0324) 0.2567 (0.0174 0.0679)  
MAG 0.1945 (0.0677 0.3480) 0.5493 (0.0500 0.0911) 0.3478 (0.0333 0.0960) 0.7259 (0.0672 0.0925) 0.4545 (0.0414 0.0912) 1.1178 (0.0349 0.0312) 0.5320 (0.0347 0.0652) 0.5446 (0.0335 0.0615)  
PDU 0.2332 (0.0907 0.3890) 0.6154 (0.0581 0.0944) 0.4156 (0.0415 0.0998) 0.4490 (0.0752 0.1676) 0.5237 (0.0495 0.0945) 1.3401 (0.0434 0.0324) 0.5062 (0.0343 0.0678)-1.0000 (0.0082 0.0000) 0.6680 (0.0411 0.0615)  
PLU 0.2160 (0.0854 0.3954) 0.3980 (0.0519 0.1305) 0.2504 (0.0346 0.1382) 0.4105 (0.0697 0.1699) 0.2623 (0.0342 0.1305) 0.5402 (0.0363 0.0672) 0.2545 (0.0269 0.1057) 0.0000 (0.0000 0.0316) 0.3588 (0.0342 0.0954) 0.2635 (0.0083 0.0316)  
MAU 0.2242 (0.0663 0.2956) 0.2114 (0.0509 0.2406) 0.2443 (0.0516 0.2111) 0.3527 (0.0864 0.2450) 0.2376 (0.0776 0.3268) 0.3528 (0.0922 0.2613) 0.2594 (0.0819 0.3158) 0.2369 (0.0697 0.2943) 0.3423 (0.0687 0.2006) 0.2926 (0.0860 0.2938) 0.2338 (0.0808 0.3456)  
PSU 0.1963 (0.0660 0.3365) 0.2285 (0.0640 0.2802) 0.2268 (0.0555 0.2445) 0.3966 (0.0931 0.2347) 0.2467 (0.0935 0.3790) 0.3636 (0.1106 0.3041) 0.2386 (0.0886 0.3714) 0.2489 (0.0832 0.3342) 0.3340 (0.0933 0.2793) 0.2738 (0.0927 0.3387) 0.2537 (0.0874 0.3447) 0.3184 (0.0721 0.2266)  
PRO 0.2218 (0.0733 0.3395) 0.3534 (0.0699 0.1978) 0.4278 (0.0710 0.1659) 0.5296 (0.0946 0.1786) 0.2839 (0.0800 0.2916) 0.5548 (0.1180 0.2127) 0.3587 (0.0955 0.2661) 0.3689 (0.0895 0.2426) 0.4046 (0.0798 0.1972) 0.4944 (0.0993 0.2454) 0.3777 (0.0942 0.2493) 0.3342 (0.0781 0.2336) 0.9163 (0.0614 0.0670)  
PCM 0.1963 (0.0660 0.3365) 0.2285 (0.0640 0.2802) 0.2268 (0.0555 0.2445) 0.3966 (0.0931 0.2347) 0.2467 (0.0935 0.3790) 0.3636 (0.1106 0.3041) 0.2386 (0.0886 0.3714) 0.2489 (0.0832 0.3342) 0.3340 (0.0933 0.2793) 0.2738 (0.0927 0.3387) 0.2537 (0.0874 0.3447) 0.3184 (0.0721 0.2266)-1.0000 (0.0000 0.0000) 0.9163 (0.0614 0.0670)  
MMU 0.3442 (0.0737 0.2141) 0.1245 (0.0245 0.1969) 0.2001 (0.0418 0.2087) 0.2331 (0.0758 0.3250) 0.2105 (0.0672 0.3194) 0.2889 (0.0807 0.3000) 0.1984 (0.0709 0.3572) 0.1786 (0.0594 0.3327) 0.1841 (0.0585 0.3181) 0.2270 (0.0754 0.3321) 0.1810 (0.0699 0.3862) 0.1609 (0.0574 0.3564) 0.1682 (0.0705 0.4192)

TREE # 1: (16, (1, (((((13, 15), 14), 12), ((2, 3), (4, (5, (7, ((9, 6), (8, (10, 11)))))))))); MP score: -1

This is a rooted tree. Please check!

check convergence..

lnL(ntime: 30 np: 35): -616.334614 +0.000000

17..16 17..18 18..1 18..19 19..20 20..21 21..22 22..13 22..15 21..14 20..12 19..23 23..24 24..2 24..3 23..25 25..4 25..26 26..5 26..27 27..7 27..28 28..29 29..9 29..6  
28..30 30..8 30..31 31..10 31..11  
0.118722 0.074115 0.249133 0.000004 0.118663 0.146153 0.119262 0.000004 0.000004 0.115870 0.136523 0.177059 0.012937 0.044151 0.000004 0.035304 0.164116 0.039390 0.089812 0.028259 0.067366 0.000004 0.000004 0.064546 0.071478  
0.066473 0.000004 0.000004 0.021777 0.022061 3.279198 0.632820 0.267891 0.064803 2.737211

Note: Branch length is defined as number of nucleotide substitutions per codon (not per nucleotide site).

tree length = 1.98320

(16: 0.118722, (1: 0.249133, (((((13: 0.000004, 15: 0.000004): 0.119262, 14: 0.115870): 0.146153, 12: 0.136523): 0.118663, ((2: 0.044151, 3: 0.000004): 0.012937, (4: 0.164116, (5: 0.089812, (7: 0.067366, ((9: 0.064546, 6: 0.071478): 0.000004, (8: 0.000004, (10: 0.021777, 11: 0.022061): 0.000004): 0.066473): 0.000004): 0.028259): 0.039390): 0.035304): 0.177059): 0.000004): 0.074115);

(MMU: 0.118722, (SHI: 0.249133, (((((PSU: 0.000004, PCM: 0.000004): 0.119262, PRO: 0.115870): 0.146153, MAU: 0.136523): 0.118663, ((ASA: 0.044151, ATE: 0.000004): 0.012937, (CGL: 0.164116, (CNI: 0.089812, (MCA: 0.067366, ((MAG: 0.064546, MAR: 0.071478): 0.000004, (MGE: 0.000004, (PDU: 0.021777, PLU: 0.022061): 0.000004): 0.066473): 0.000004): 0.028259): 0.039390): 0.035304): 0.177059): 0.000004): 0.074115);

Detailed output identifying parameters

kappa (ts/tv) = 3.27920

dN/dS (w) for site classes (K=3)

p: 0.63282 0.26789 0.09929  
w: 0.06480 1.00000 2.73721

dN & dS for each branch

| branch | t     | N     | S    | dN/dS  | dN     | dS     | N*dN | S*dS |
|--------|-------|-------|------|--------|--------|--------|------|------|
| 17..16 | 0.119 | 121.0 | 44.0 | 0.5807 | 0.0332 | 0.0571 | 4.0  | 2.5  |
| 17..18 | 0.074 | 121.0 | 44.0 | 0.5807 | 0.0207 | 0.0357 | 2.5  | 1.6  |
| 18..1  | 0.249 | 121.0 | 44.0 | 0.5807 | 0.0696 | 0.1199 | 8.4  | 5.3  |
| 18..19 | 0.000 | 121.0 | 44.0 | 0.5807 | 0.0000 | 0.0000 | 0.0  | 0.0  |
| 19..20 | 0.119 | 121.0 | 44.0 | 0.5807 | 0.0332 | 0.0571 | 4.0  | 2.5  |
| 20..21 | 0.146 | 121.0 | 44.0 | 0.5807 | 0.0408 | 0.0703 | 4.9  | 3.1  |
| 21..22 | 0.119 | 121.0 | 44.0 | 0.5807 | 0.0333 | 0.0574 | 4.0  | 2.5  |
| 22..13 | 0.000 | 121.0 | 44.0 | 0.5807 | 0.0000 | 0.0000 | 0.0  | 0.0  |
| 22..15 | 0.000 | 121.0 | 44.0 | 0.5807 | 0.0000 | 0.0000 | 0.0  | 0.0  |
| 21..14 | 0.116 | 121.0 | 44.0 | 0.5807 | 0.0324 | 0.0558 | 3.9  | 2.5  |
| 20..12 | 0.137 | 121.0 | 44.0 | 0.5807 | 0.0382 | 0.0657 | 4.6  | 2.9  |
| 19..23 | 0.177 | 121.0 | 44.0 | 0.5807 | 0.0495 | 0.0852 | 6.0  | 3.8  |
| 23..24 | 0.013 | 121.0 | 44.0 | 0.5807 | 0.0036 | 0.0062 | 0.4  | 0.3  |
| 24..2  | 0.044 | 121.0 | 44.0 | 0.5807 | 0.0123 | 0.0213 | 1.5  | 0.9  |
| 24..3  | 0.000 | 121.0 | 44.0 | 0.5807 | 0.0000 | 0.0000 | 0.0  | 0.0  |
| 23..25 | 0.035 | 121.0 | 44.0 | 0.5807 | 0.0099 | 0.0170 | 1.2  | 0.7  |
| 25..4  | 0.164 | 121.0 | 44.0 | 0.5807 | 0.0459 | 0.0790 | 5.5  | 3.5  |
| 25..26 | 0.039 | 121.0 | 44.0 | 0.5807 | 0.0110 | 0.0190 | 1.3  | 0.8  |
| 26..5  | 0.090 | 121.0 | 44.0 | 0.5807 | 0.0251 | 0.0432 | 3.0  | 1.9  |
| 26..27 | 0.028 | 121.0 | 44.0 | 0.5807 | 0.0079 | 0.0136 | 1.0  | 0.6  |
| 27..7  | 0.067 | 121.0 | 44.0 | 0.5807 | 0.0188 | 0.0324 | 2.3  | 1.4  |
| 27..28 | 0.000 | 121.0 | 44.0 | 0.5807 | 0.0000 | 0.0000 | 0.0  | 0.0  |
| 28..29 | 0.000 | 121.0 | 44.0 | 0.5807 | 0.0000 | 0.0000 | 0.0  | 0.0  |
| 29..9  | 0.065 | 121.0 | 44.0 | 0.5807 | 0.0180 | 0.0311 | 2.2  | 1.4  |
| 29..6  | 0.071 | 121.0 | 44.0 | 0.5807 | 0.0200 | 0.0344 | 2.4  | 1.5  |
| 28..30 | 0.066 | 121.0 | 44.0 | 0.5807 | 0.0186 | 0.0320 | 2.2  | 1.4  |
| 30..8  | 0.000 | 121.0 | 44.0 | 0.5807 | 0.0000 | 0.0000 | 0.0  | 0.0  |
| 30..31 | 0.000 | 121.0 | 44.0 | 0.5807 | 0.0000 | 0.0000 | 0.0  | 0.0  |
| 31..10 | 0.022 | 121.0 | 44.0 | 0.5807 | 0.0061 | 0.0105 | 0.7  | 0.5  |
| 31..11 | 0.022 | 121.0 | 44.0 | 0.5807 | 0.0062 | 0.0106 | 0.7  | 0.5  |

Naive Empirical Bayes (NEB) analysis

Positively selected sites (\*: P>95%; \*\*: P>99%)

(amino acids refer to 1st sequence: SHI)

Pr(w>1) post mean +- SE for w

|      |       |       |
|------|-------|-------|
| 6 T  | 0.903 | 2.568 |
| 12 H | 0.749 | 2.302 |
| 24 * | 0.783 | 2.359 |

Bayes Empirical Bayes (BEB) analysis (Yang, Wong & Nielsen 2005. Mol. Biol. Evol. 22:1107-1118)

Positively selected sites (\*: P>95%; \*\*: P>99%)

(amino acids refer to 1st sequence: SHI)

Pr(w>1) post mean +- SE for w

|      |       |                |
|------|-------|----------------|
| 6 T  | 0.864 | 3.052 +- 1.837 |
| 12 H | 0.646 | 2.215 +- 1.398 |
| 24 * | 0.727 | 2.580 +- 1.684 |

The grid (see ternary graph for p0-p1)

w0: 0.050 0.150 0.250 0.350 0.450 0.550 0.650 0.750 0.850 0.950  
w2: 1.500 2.500 3.500 4.500 5.500 6.500 7.500 8.500 9.500 10.500

Posterior on the grid

w0: 0.725 0.252 0.022 0.001 0.000 0.000 0.000 0.000 0.000 0.000 0.000  
w2: 0.240 0.288 0.189 0.118 0.070 0.041 0.024 0.015 0.009 0.006

Posterior for p0-p1 (see the ternary graph)

0.000  
0.000 0.000 0.000  
0.000 0.000 0.000 0.000 0.000  
0.000 0.000 0.000 0.000 0.000 0.000 0.001  
0.000 0.000 0.000 0.000 0.000 0.000 0.002 0.014  
0.000 0.000 0.000 0.000 0.000 0.000 0.001 0.008 0.028 0.068  
0.000 0.000 0.000 0.000 0.000 0.000 0.000 0.003 0.012 0.045 0.094 0.099  
0.000 0.000 0.000 0.000 0.000 0.000 0.000 0.001 0.005 0.019 0.044 0.072 0.097 0.044  
0.000 0.000 0.000 0.000 0.000 0.000 0.000 0.001 0.003 0.010 0.021 0.035 0.052 0.039 0.033 0.007  
0.000 0.000 0.000 0.000 0.000 0.000 0.000 0.001 0.002 0.007 0.014 0.024 0.030 0.025 0.023 0.009 0.005 0.000

sum of density on p0-p1 = 1.000000

Time used: 1:53
