# Supplementary material for: Sexual Selection Halts the Relaxation of Protamine 2 among Rodents
Source: PubMed Central journal article supplement (PMC3244444; doi:10.1371/journal.pone.0029247), 2011-12-21
Supplement: pone.0029247.s008.pdf [file pone.0029247.s008.pdf]

**Figure S8. Mature Protamine 2  
Codeml output file M2**

Arvicola sadipus (ASA)  
 Arvicola terrestris (ATE)  
 Clethrionomys glareolus (CGL)  
 Cricetulus griseus (CGR)  
 Chionomys nivalis (CNI)  
 Microtus agrestis (MAG)  
 Microtus arvalis (MAR)  
 Mesocricetus auratus (MAU)  
 Microtus cabrerai (MCA)  
 Microtus gerbei (MGE)  
 Mus musculus musculus (MMU)  
 Phodopus campbelli (PCM)  
 Pitymys duodecimcostatus (PDU)  
 Pitymys lusitanicus (PLU)  
 Phodopus roborovskii (PRO)  
 Phodopus sugorus (PSU)  
 Sigmodon hispidus (SHI)

16 162

|     |     |     |     |     |     |     |     |     |     |     |     |     |     |     |     |     |     |     |     |     |     |     |     |     |     |     |     |     |     |     |     |     |     |     |     |     |     |     |     |     |     |     |     |     |     |     |     |     |     |     |     |     |     |     |
|-----|-----|-----|-----|-----|-----|-----|-----|-----|-----|-----|-----|-----|-----|-----|-----|-----|-----|-----|-----|-----|-----|-----|-----|-----|-----|-----|-----|-----|-----|-----|-----|-----|-----|-----|-----|-----|-----|-----|-----|-----|-----|-----|-----|-----|-----|-----|-----|-----|-----|-----|-----|-----|-----|-----|
| SHI | TCG | CGT | AGG | AGA | CTG | CAC | CGG | ATC | CAT | AAG | AGA | CGT | CGG | TCA | TGC | AGG | AGG | CGA | AGG | AGA | CAC | TCC | TGC | CGC | CAC | AGG | AGG | CGG | CAT | CGC | AGA | GGC | TGC | AAA | AGA | TCC | CG- | --- | --G | AGG | AGG | AGA | TGC | AGG | TGC | AGG | AAG | TGT | AGG | AGG | CAC | CAC | CAC | --- |
| ASA | TCG | CGT | AGA | AAG | TTG | TAC | CGG | ATC | CAT | AGG | AGA | CGC | AGG | TCA | TGC | AGG | AGG | CG- | --G | AGA | CGT | TCC | TGC | CGC | CAC | AGG | AGG | CGG | CAT | CGT | AGG | GGC | TGC | AGA | AGA | TCC | CG- | --A | AGG | AGG | AGG | AGA | TGT | AGG | TGC | AGG | AAG | TGT | AGG | AGG | CAC | CGC | CAC | --- |
| ATE | TCG | CGT | AGA | AAG | TTG | TAC | CGG | ATC | CAC | AGG | AGA | CGC | AGG | TCA | TGC | AGG | AGG | AG- | --G | AGA | CGT | TCC | TKC | CGC | CAC | AGG | AGG | CGG | CAT | CGT | AGG | GGC | TGC | AGA | AGA | TCC | CG- | --A | AGG | AGG | AGG | AGA | TGT | AGG | TGC | AGG | AAG | TGT | AGG | AGG | CAC | CGC | CAC | --- |
| CGL | TCG | CGT | AGG | AAG | TTG | TAC | CGG | ATC | CAC | AGG | AGA | CGC | CGG | TCA | TGC | AGG | AGG | CG- | --G | AGA | CGT | TCC | TGC | CGC | CAC | AGG | AGG | CGG | CAT | CGT | AGA | GGC | GGC | AGA | AGA | TGC | CG- | --A | AGG | AGG | AGG | AGA | TGT | AGG | TGC | AGA | AAG | TGT | AGG | AGG | TAC | CGC | TAC | --- |
| CNI | TCG | CGT | AGG | AAG | TTG | CAT | CGG | ATC | CAC | AGG | AGA | CGC | CGG | TCA | TGC | AGG | AGG | CG- | --G | AGA | CGT | TCC | TGC | CGC | CAC | AGG | AGG | CGG | CAT | CGT | AGA | GGC | TGC | AGA | AGA | TCC | CG- | --G | AGG | AGG | AGG | AGA | TGT | AGG | TGC | AGG | AAG | TGT | AGG | CGC | CAC | CAC | --- |     |
| MAR | TCG | CGT | AGG | AAG | TTG | CAT | CGG | ATC | CAC | AGG | AGA | CGC | CGG | TCA | TGC | AGG | AGG | CG- | --G | AGA | CGT | TCC | TGC | CGC | CAC | AGG | AGG | CGG | CAT | CGT | AGA | GGC | TGC | AGA | AGA | TCC | CGA | AGG | AGG | AGG | AGG | AGA | TGT | AGG | TGC | AGG | AAG | TGT | AGG | AGG | CGC | TAC | CAC | --- |
| MCA | TCG | CGT | AGG | AAG | TTG | CAT | CGG | ATC | CAC | AGG | AGA | CGC | CGG | TCA | TGC | AGG | AGG | CG- | --G | AGA | CGT | TCC | TGC | CGC | CAC | AGG | AGG | CGG | CAT | CGT | AGA | GGC | TGC | AGA | AGA | TCC | CG- | --A | AGG | AGG | AGG | AGA | TGT | AGG | TGC | AGG | AGG | TGT | AGG | AGG | CGC | CAC | CAC | --- |
| MGE | TCG | CGT | AGG | AAG | TTG | CAT | CGG | ATC | CAC | AGG | AGA | CGC | CGG | TCA | TGC | AGG | AGG | CG- | --G | AGA | CGT | TCC | TGC | CGC | CAC | AGG | AGG | CGG | CAT | CGT | AGA | GGC | TGC | AGA | AGA | TCC | CGA | AGG | AGG | AGG | AGG | AGA | TGT | AGG | TGC | AGG | AGG | TGT | AGG | AGG | CGC | TAC | CAC | --- |
| MAG | TCG | CGT | AGG | AAG | TTG | CAT | CGG | ATC | CAC | AGG | AGA | CGC | CGG | TCA | TGC | AGG | AGG | CG- | --G | AGA | CGT | TCC | TGC | CGC | CAC | AGG | AGG | CGG | CAT | CGT | AGA | GGC | TGC | AGA | AGA | TCC | CGA | AGG | AGG | AGG | A-- | -GA | TGT | AGG | TGC | AGG | AGG | TGT | AGG | AGG | CGC | TAC | CAC | --- |
| PDU | TCG | CGT | AGG | AAG | TTG | CAT | CGG | ATC | CAC | AGG | AGA | CGC | CGG | TCA | TGC | AGG | AGG | CG- | --G | AGA | CGT | TCC | TGC | CGC | CAC | AGG | AGG | CGG | CAT | CGT | AGA | GGC | TGC | AGA | AGA | TCC | CGA | AGG | AGG | AGG | AGG | AGA | TGT | AGG | TGC | AGG | AGG | TGT | AGG | AGG | CGC | TAC | CAC | --- |
| PLU | TCG | CGT | AGG | AAG | TTG | CAT | CGG | ATC | CAC | AGG | AGA | CGC | CGG | TCA | TGC | AGG | AGG | CG- | --G | AGA | CGT | TCC | TGC | CGC | CAC | AGG | AGG | CGG | CAT | CGT | AGA | GGC | TGC | AGA | AGA | TCC | CGA | AGG | AGG | AGG | AGG | AGA | TGT | AGG | TGC | AGG | AGG | TGT | AGG | AGG | CGC | TAC | CAC | --- |
| MAU | TCG | CGT | AGG | AAG | CTG | TAC | CGA | ATC | CAC | AGG | AGG | CGC | CGG | TCA | TGC | AGG | AGG | CGG | AGG | AGA | CAC | TCC | TGC | CGT | CAC | AGG | AGA | CGG | CAT | CGC | AGA | GGC | TGC | AGA | AGA | TCA | CG- | --C | AGG | AGG | AGG | AGA | TGC | AGG | TGC | AGG | AGG | TGT | AGG | AGG | CAC | CAC | CAC | --- |
| PSU | TCG | CGT | AGA | AGG | CTG | CAC | CGG | ATC | CAC | AAG | AGG | CGC | CGG | TCA | TGC | AGG | AGG | CG- | --G | AGA | CAC | TCC | TGC | TGC | CAC | AGG | AGG | CGG | CAT | CGC | AGA | GGC | TGC | AGA | AGA | TCC | CG- | --C | AGG | AGG | AGG | AGA | TGC | AGG | TGC | AGG | AAG | TGT | AGG | AGG | CAC | CAC | CAC | CAC |
| PRO | TCA | CGT | AGG | AGG | CTG | CAC | CGG | ATC | CAC | AAG | AGG | CGC | CGG | TCA | TGC | AGG | AGG | CG- | --G | AGA | CAC | TCC | TGC | CGC | CAC | AGG | AGG | CGG | CAT | CGC | AGA | GGC | TGC | AGA | AGA | TCC | CG- | --C | AGG | AGG | AGG | AGA | TGC | AGG | TGC | AGG | AAG | TGT | AGG | AGG | CAC | CAC | CAC | CAC |
| PCM | TCG | CGT | AGA | AGG | CTG | CAC | CGG | ATC | CAC | AAG | AGG | CGC | CGG | TCA | TGC | AGG | AGG | CG- | --G | AGA | CAC | TCC | TGC | TGC | CAC | AGG | AGG | CGG | CAT | CGC | AGA | GGC | TGC | AGA | AGA | TCC | CG- | --C | AGG | AGG | AGG | AGA | TGC | AGG | TGC | AGG | AAG | TGT | AGG | AGG | CAC | CAC | CAC | --- |
| MMU | TCT | CGT | AAG | AGG | CTA | CAT | AGG | ATC | CAC | AAG | AGG | CGT | CGG | TCA | TGC | AGA | AGG | CGG | AGG | AGA | CAC | TCC | TGC | CGC | CAC | AGG | AGG | CGG | CAT | CGC | AGA | GGC | TGC | AGA | AGA | TCC | CG- | --A | AGG | AGG | AGG | AGA | TGC | AGG | TGC | AGG | AAA | TGT | AGG | AGG | CAC | CAT | CAC | --- |

Printing out site pattern counts

16 144 P

|     |     |     |     |     |     |     |     |     |     |     |     |     |     |     |     |     |     |     |     |     |     |     |     |     |     |     |     |     |     |     |     |     |     |     |     |     |     |     |     |     |     |     |     |     |     |     |     |
|-----|-----|-----|-----|-----|-----|-----|-----|-----|-----|-----|-----|-----|-----|-----|-----|-----|-----|-----|-----|-----|-----|-----|-----|-----|-----|-----|-----|-----|-----|-----|-----|-----|-----|-----|-----|-----|-----|-----|-----|-----|-----|-----|-----|-----|-----|-----|-----|
| SHI | --- | --- | --G | AAA | AAG | AAG | AGA | AGA | AGA | AGA | AGG | AGG | AGG | AGG | AGG | AGG | AGG | ATC | CAC | CAC | CAC | CAC | CAC | CAC | CAT | CAT | CG- | CGA | CGC | CGC | CGG | CGG | CGG | CGT | CGT | CTG | GGC | TCA | TCC | TCC | TCG | TGC | TGC | TGC | TGC | TGT | TGT |
| ASA | --- | --A | AGG | AGA | AAG | AGG | AAG | AGA | AGA | AGA | AGG | --G | AGA | AGG | AGG | AGG | AGG | ATC | CAC | CAC | CAC | CGC | CGT | TAC | CAT | CAT | CG- | CG- | CGC | CGT | AGG | CGG | CGG | CGC | CGT | TTG | GGC | TCA | TCC | TCC | TCG | TGC | TGC | TGC | TGT | TGT |     |
| ATE | --- | --A | AGG | AGA | AAG | AGG | AAG | AGA | AGA | AGA | AGG | --G | AGA | AGG | AGG | AGG | AGG | ATC | CAC | CAC | CAC | CGC | CGT | TAC | CAC | CAT | CG- | AG- | CGC | CGT | AGG | CGG | CGG | CGC | CGT | TTG | GGC | TCA | TCC | TCC | TCG | TGC | TGC | TKC | TGT | TGT |     |
| CGL | --- | --A | AGG | AGA | AAG | AGG | AAG | AGA | AGA | AGA | AGG | --G | AGG | AGA | AGG | AGG | AGG | ATC | CAC | TAC | TAC | CGC | CGT | TAC | CAC | CAT | CG- | CG- | CGC | CGT | CGG | CGG | CGG | CGC | CGT | TTG | GGC | TCA | TCC | TGC | TCG | GGC | TGC | TGC | TGT | TGT |     |
| CNI | --- | --G | AGG | AGA | AAG | AGG | AAG | AGA | AGA | AGA | AGG | --G | AGG | AGG | AGG | AGG | AGG | CGC | ATC | CAC | --- | CAC | CAC | CGT | CAT | CAC | CAT | CG- | CG- | CGC | CGT | CGG | CGG | CGG | CGC | CGT | TTG | GGC | TCA | TCC | TCC | TCG | TGC | TGC | TGC | TGT | TGT |

MAR --- AGG AGG AGA AAG AGG AAG AGA AGA AGA AGA --G AGG AGG AGG AGG AGG AGG AGG ATC CAC CAC CGC TAC CGT CAT CAC CAT CGA CG- CGC CGT CGG CGG CGG CGC CGT TTG GGC TCA TCC TCC TCG TGC TGC TGC TGT TGT  
MCA --- --A AGG AGA AGG AGG AAG AGA AGA AGA AGA --G AGG AGG AGG AGG AGG AGG AGG ATC CAC CAC CGC CAC CGT CAT CAC CAT CG- CG- CGC CGT CGG CGG CGG CGC CGT TTG GGC TCA TCC TCC TCG TGC TGC TGC TGT TGT  
MGE --- AGG AGG AGA AGG AGG AAG AGA AGA AGA AGA --G AGG AGG AGG AGG AGG AGG AGG ATC CAC CAC CGC TAC CGT CAT CAC CAT CGA CG- CGC CGT CGG CGG CGG CGC CGT TTG GGC TCA TCC TCC TCG TGC TGC TGC TGT TGT  
MAG --- AGG AGG AGA AGG AGG AAG -GA AGA AGA AGA --G AGG AGG A-- AGG AGG AGG AGG ATC CAC CAC CGC TAC CGT CAT CAC CAT CGA CG- CGC CGT CGG CGG CGG CGC CGT TTG GGC TCA TCC TCC TCG TGC TGC TGC TGT TGT  
PDU --- AGG AGG AGA AGG AGG AAG AGA AGA AGA AGA --G AGG AGG AGG AGG AGG AGG AGG ATC CAC CAC CGC TAC CGT CAT CAC CAT CGA CG- CGC CGT CGG CGG CGG CGC CGT TTG GGC TCA TCC TCC TCG TGC TGC TGC TGT TGT  
PLU --- AGG AGG AGA AGG AGG AAG AGA AGA AGA AGA --G AGG AGG AGG AGG AGG AGG AGG ATC CAC CAC CGC TAC CGT CAT CAC CAT CGA CG- CGC CGT CGG CGG CGG CGC CGT TTG GGC TCA TCC TCC TCG TGC TGC TGC TGT TGT  
MAU --- --C AGG AGA AGG AGG AAG AGA AGA AGG AGA AGG AGG AGG AGG AGG ATC CAC CAC CAC CAC CAC TAC CAT CG- CGG CGT CGC CGG CGA CGG CGC CGT CTG GGC TCA TCC TCA TCG TGC TGC TGC TGC TGT  
PSU CAC --C AGG AGA AAG AAG AGG AGA AGA AGG AGA --G AGA AGG AGG AGG AGG AGG AGG ATC CAC CAC CAC CAC CAC CAT CG- CG- TGC CGC CGG CGG CGG CGC CGT CTG GGC TCA TCC TCC TCG TGC TGC TGC TGC TGT  
PRO CAC --C AGG AGA AAG AAG AGG AGA AGA AGG AGA --G AGG AGG AGG AGG AGG AGG AGG ATC CAC TAC CAC CAC CAC CAC CAT CG- CG- CGC CGC CGG CGG CGG CGC CGT CTG GGC TCA TCC TCC TCA TGC TGC TGC TGC TGT  
PCM --- --C AGG AGA AAG AAG AGG AGA AGA AGG AGA --G AGA AGG AGG AGG AGG AGG AGG ATC CAC CAC CAC CAC CAC CAC CAT CG- CG- TGC CGC CGG CGG CGG CGC CGT CTG GGC TCA TCC TCC TCG TGC TGC TGC TGC TGT  
MMU --- --A AGG AGA AAA AAG AGG AGA AGA AGG AGA AGG AAG AGG AGG AGG AGA AGG AGG AGG ATC CAC CAC CAC CAT CAC CAT CAC CAT CG- CGG CGC CGC CGG AGG CGG CGT CGT CTA GGC TCA TCC TCC TCT TGC TGC TGC TGC TGT

1 1 1 1 1 1 1 2 1 1 1 1 1 1  
1 1 5 1 1 1 1 1 1 1 1 1 1 1  
1 1 1 1 1 1 1 1 1 1 1 1 1 2  
1 1 1

CODONML (in paml version 4.4d, March 2011) 1.phy  
Model: One dN/dS ratio for branches  
Codon frequency model: Fcodon  
Site-class models: PositiveSelection  
ns = 16 ls = 54

Codon usage in sequences

|     |     |   |   |   |   |   |   |     |     |   |   |   |   |   |   |     |     |   |   |   |   |   |   |     |     |    |    |    |    |    |    |
|-----|-----|---|---|---|---|---|---|-----|-----|---|---|---|---|---|---|-----|-----|---|---|---|---|---|---|-----|-----|----|----|----|----|----|----|
| Phe | TTT | 0 | 0 | 0 | 0 | 0 | 0 | Ser | TCT | 0 | 0 | 0 | 0 | 0 | 0 | Tyr | TAT | 0 | 0 | 0 | 0 | 0 | 0 | Cys | TGT | 1  | 2  | 2  | 2  | 2  | 2  |
|     | TTC | 0 | 0 | 0 | 0 | 0 | 0 |     | TCC | 2 | 2 | 2 | 1 | 2 | 2 |     | TAC | 0 | 1 | 1 | 3 | 0 | 1 |     | TGC | 5  | 4  | 3  | 4  | 4  | 4  |
| Leu | TTA | 0 | 0 | 0 | 0 | 0 | 0 |     | TCA | 1 | 1 | 1 | 1 | 1 | 1 | *** | TAA | 0 | 0 | 0 | 0 | 0 | 0 | *** | TGA | 0  | 0  | 0  | 0  | 0  | 0  |
|     | TTG | 0 | 1 | 1 | 1 | 1 | 1 |     | TCG | 1 | 1 | 1 | 1 | 1 | 1 |     | TAG | 0 | 0 | 0 | 0 | 0 | 0 |     | TGG | 0  | 0  | 0  | 0  | 0  | 0  |
| Leu | CTT | 0 | 0 | 0 | 0 | 0 | 0 | Pro | CCT | 0 | 0 | 0 | 0 | 0 | 0 | His | CAT | 2 | 2 | 1 | 1 | 2 | 2 | Arg | CGT | 2  | 3  | 3  | 3  | 3  | 3  |
|     | CTC | 0 | 0 | 0 | 0 | 0 | 0 |     | CCC | 0 | 0 | 0 | 0 | 0 | 0 |     | CAC | 6 | 3 | 4 | 2 | 4 | 3 |     | CGC | 2  | 3  | 3  | 3  | 3  | 3  |
|     | CTA | 0 | 0 | 0 | 0 | 0 | 0 |     | CCA | 0 | 0 | 0 | 0 | 0 | 0 | Gln | CAA | 0 | 0 | 0 | 0 | 0 | 0 |     | CGA | 1  | 0  | 0  | 0  | 0  | 1  |
|     | CTG | 1 | 0 | 0 | 0 | 0 | 0 |     | CCG | 0 | 0 | 0 | 0 | 0 | 0 |     | CAG | 0 | 0 | 0 | 0 | 0 | 0 |     | CGG | 3  | 2  | 2  | 3  | 3  | 3  |
| Ile | ATT | 0 | 0 | 0 | 0 | 0 | 0 | Thr | ACT | 0 | 0 | 0 | 0 | 0 | 0 | Asn | AAT | 0 | 0 | 0 | 0 | 0 | 0 | Ser | AGT | 0  | 0  | 0  | 0  | 0  | 0  |
|     | ATC | 1 | 1 | 1 | 1 | 1 | 1 |     | ACC | 0 | 0 | 0 | 0 | 0 | 0 |     | AAC | 0 | 0 | 0 | 0 | 0 | 0 |     | AGC | 0  | 0  | 0  | 0  | 0  | 0  |
|     | ATA | 0 | 0 | 0 | 0 | 0 | 0 |     | ACA | 0 | 0 | 0 | 0 | 0 | 0 | Lys | AAA | 1 | 0 | 0 | 0 | 0 | 0 | Arg | AGA | 6  | 6  | 6  | 7  | 6  | 6  |
| Met | ATG | 0 | 0 | 0 | 0 | 0 | 0 |     | ACG | 0 | 0 | 0 | 0 | 0 | 0 |     | AAG | 2 | 2 | 2 | 2 | 2 | 2 |     | AGG | 12 | 14 | 14 | 12 | 12 | 14 |
| Val | GTT | 0 | 0 | 0 | 0 | 0 | 0 | Ala | GCT | 0 | 0 | 0 | 0 | 0 | 0 | Asp | GAT | 0 | 0 | 0 | 0 | 0 | 0 | Gly | GGT | 0  | 0  | 0  | 0  | 0  | 0  |
|     | GTC | 0 | 0 | 0 | 0 | 0 | 0 |     | GCC | 0 | 0 | 0 | 0 | 0 | 0 |     | GAC | 0 | 0 | 0 | 0 | 0 | 0 |     | GGC | 1  | 1  | 1  | 2  | 1  | 1  |
|     | GTA | 0 | 0 | 0 | 0 | 0 | 0 |     | GCA | 0 | 0 | 0 | 0 | 0 | 0 | Glu | GAA | 0 | 0 | 0 | 0 | 0 | 0 |     | GGA | 0  | 0  | 0  | 0  | 0  | 0  |
|     | GTG | 0 | 0 | 0 | 0 | 0 | 0 |     | GCG | 0 | 0 | 0 | 0 | 0 | 0 |     | GAG | 0 | 0 | 0 | 0 | 0 | 0 |     | GGG | 0  | 0  | 0  | 0  | 0  | 0  |

|     |     |   |   |   |   |   |   |     |     |   |   |   |   |   |   |     |     |   |   |   |   |   |   |     |     |   |   |   |   |   |   |
|-----|-----|---|---|---|---|---|---|-----|-----|---|---|---|---|---|---|-----|-----|---|---|---|---|---|---|-----|-----|---|---|---|---|---|---|
| Phe | TTT | 0 | 0 | 0 | 0 | 0 | 0 | Ser | TCT | 0 | 0 | 0 | 0 | 0 | 0 | Tyr | TAT | 0 | 0 | 0 | 0 | 0 | 0 | Cys | TGT | 2 | 2 | 2 | 2 | 2 | 1 |
|     | TTC | 0 | 0 | 0 | 0 | 0 | 0 |     | TCC | 2 | 2 | 2 | 2 | 2 | 1 |     | TAC | 0 | 1 | 1 | 1 | 1 | 1 |     | TGC | 4 | 4 | 4 | 4 | 4 | 5 |
| Leu | TTA | 0 | 0 | 0 | 0 | 0 | 0 |     | TCA | 1 | 1 | 1 | 1 | 1 | 2 | *** | TAA | 0 | 0 | 0 | 0 | 0 | 0 | *** | TGA | 0 | 0 | 0 | 0 | 0 | 0 |
|     | TTG | 1 | 1 | 1 | 1 | 1 | 0 |     | TCG | 1 | 1 | 1 | 1 | 1 | 1 |     | TAG | 0 | 0 | 0 | 0 | 0 | 0 |     | TGG | 0 | 0 | 0 | 0 | 0 | 0 |
| Leu | CTT | 0 | 0 | 0 | 0 | 0 | 0 | Pro | CCT | 0 | 0 | 0 | 0 | 0 | 0 | His | CAT | 2 | 2 | 2 | 2 | 2 | 1 | Arg | CGT | 3 | 3 | 3 | 3 | 3 | 2 |
|     | CTC | 0 | 0 | 0 | 0 | 0 | 0 |     | CCC | 0 | 0 | 0 | 0 | 0 | 0 |     | CAC | 4 | 3 | 3 | 3 | 3 | 6 |     | CGC | 3 | 3 | 3 | 3 | 3 | 2 |
|     | CTA | 0 | 0 | 0 | 0 | 0 | 0 |     | CCA | 0 | 0 | 0 | 0 | 0 | 0 | Gln | CAA | 0 | 0 | 0 | 0 | 0 | 0 |     | CGA | 0 | 1 | 1 | 1 | 1 | 1 |
|     | CTG | 0 | 0 | 0 | 0 | 0 | 1 |     | CCG | 0 | 0 | 0 | 0 | 0 | 0 |     | CAG | 0 | 0 | 0 | 0 | 0 | 0 |     | CGG | 3 | 3 | 3 | 3 | 3 | 3 |

|     |     |   |   |   |   |   |   |     |     |   |   |   |   |   |   |     |     |   |   |   |   |   |   |     |     |    |    |    |    |    |    |
|-----|-----|---|---|---|---|---|---|-----|-----|---|---|---|---|---|---|-----|-----|---|---|---|---|---|---|-----|-----|----|----|----|----|----|----|
| Ile | ATT | 0 | 0 | 0 | 0 | 0 | 0 | Thr | ACT | 0 | 0 | 0 | 0 | 0 | 0 | Asn | AAT | 0 | 0 | 0 | 0 | 0 | 0 | Ser | AGT | 0  | 0  | 0  | 0  | 0  | 0  |
|     | ATC | 1 | 1 | 1 | 1 | 1 | 1 |     | ACC | 0 | 0 | 0 | 0 | 0 | 0 |     | AAC | 0 | 0 | 0 | 0 | 0 | 0 |     | AGC | 0  | 0  | 0  | 0  | 0  | 0  |
|     | ATA | 0 | 0 | 0 | 0 | 0 | 0 |     | ACA | 0 | 0 | 0 | 0 | 0 | 0 | Lys | AAA | 0 | 0 | 0 | 0 | 0 | 0 | Arg | AGA | 6  | 6  | 5  | 6  | 6  | 6  |
| Met | ATG | 0 | 0 | 0 | 0 | 0 | 0 |     | ACG | 0 | 0 | 0 | 0 | 0 | 0 |     | AAG | 1 | 1 | 1 | 1 | 1 | 1 |     | AGG | 14 | 15 | 14 | 15 | 15 | 15 |
| Val | GTT | 0 | 0 | 0 | 0 | 0 | 0 | Ala | GCT | 0 | 0 | 0 | 0 | 0 | 0 | Asp | GAT | 0 | 0 | 0 | 0 | 0 | 0 | Gly | GGT | 0  | 0  | 0  | 0  | 0  | 0  |
|     | GTC | 0 | 0 | 0 | 0 | 0 | 0 |     | GCC | 0 | 0 | 0 | 0 | 0 | 0 |     | GAC | 0 | 0 | 0 | 0 | 0 | 0 |     | GGC | 1  | 1  | 1  | 1  | 1  | 1  |
|     | GTA | 0 | 0 | 0 | 0 | 0 | 0 |     | GCA | 0 | 0 | 0 | 0 | 0 | 0 | Glu | GAA | 0 | 0 | 0 | 0 | 0 | 0 |     | GGA | 0  | 0  | 0  | 0  | 0  | 0  |
|     | GTG | 0 | 0 | 0 | 0 | 0 | 0 |     | GCG | 0 | 0 | 0 | 0 | 0 | 0 |     | GAG | 0 | 0 | 0 | 0 | 0 | 0 |     | GGG | 0  | 0  | 0  | 0  | 0  | 0  |

|     |     |   |   |   |   |     |     |   |   |   |   |     |     |   |   |   |   |     |     |    |    |    |    |
|-----|-----|---|---|---|---|-----|-----|---|---|---|---|-----|-----|---|---|---|---|-----|-----|----|----|----|----|
| Phe | TTT | 0 | 0 | 0 | 0 | Ser | TCT | 0 | 0 | 0 | 1 | Tyr | TAT | 0 | 0 | 0 | 0 | Cys | TGT | 1  | 1  | 1  | 1  |
|     | TTC | 0 | 0 | 0 | 0 |     | TCC | 2 | 2 | 2 | 2 |     | TAC | 0 | 1 | 0 | 0 |     | TGC | 6  | 5  | 6  | 5  |
| Leu | TTA | 0 | 0 | 0 | 0 |     | TCA | 1 | 2 | 1 | 1 | *** | TAA | 0 | 0 | 0 | 0 | *** | TGA | 0  | 0  | 0  | 0  |
|     | TTG | 0 | 0 | 0 | 0 |     | TCG | 1 | 0 | 1 | 0 |     | TAG | 0 | 0 | 0 | 0 | Trp | TGG | 0  | 0  | 0  | 0  |
| Leu | CTT | 0 | 0 | 0 | 0 | Pro | CCT | 0 | 0 | 0 | 0 | His | CAT | 1 | 1 | 1 | 3 | Arg | CGT | 1  | 1  | 1  | 2  |
|     | CTC | 0 | 0 | 0 | 0 |     | CCC | 0 | 0 | 0 | 0 |     | CAC | 8 | 7 | 7 | 5 |     | CGC | 2  | 3  | 2  | 2  |
|     | CTA | 0 | 0 | 0 | 1 |     | CCA | 0 | 0 | 0 | 0 | Gln | CAA | 0 | 0 | 0 | 0 |     | CGA | 0  | 0  | 0  | 0  |
|     | CTG | 1 | 1 | 1 | 0 |     | CCG | 0 | 0 | 0 | 0 |     | CAG | 0 | 0 | 0 | 0 |     | CGG | 3  | 3  | 3  | 3  |
| Ile | ATT | 0 | 0 | 0 | 0 | Thr | ACT | 0 | 0 | 0 | 0 | Asn | AAT | 0 | 0 | 0 | 0 | Ser | AGT | 0  | 0  | 0  | 0  |
|     | ATC | 1 | 1 | 1 | 1 |     | ACC | 0 | 0 | 0 | 0 |     | AAC | 0 | 0 | 0 | 0 |     | AGC | 0  | 0  | 0  | 0  |
|     | ATA | 0 | 0 | 0 | 0 |     | ACA | 0 | 0 | 0 | 0 | Lys | AAA | 0 | 0 | 0 | 1 | Arg | AGA | 6  | 5  | 6  | 6  |
| Met | ATG | 0 | 0 | 0 | 0 |     | ACG | 0 | 0 | 0 | 0 |     | AAG | 2 | 2 | 2 | 2 |     | AGG | 13 | 14 | 13 | 14 |
| Val | GTT | 0 | 0 | 0 | 0 | Ala | GCT | 0 | 0 | 0 | 0 | Asp | GAT | 0 | 0 | 0 | 0 | Gly | GGT | 0  | 0  | 0  | 0  |
|     | GTC | 0 | 0 | 0 | 0 |     | GCC | 0 | 0 | 0 | 0 |     | GAC | 0 | 0 | 0 | 0 |     | GGC | 1  | 1  | 1  | 1  |
|     | GTA | 0 | 0 | 0 | 0 |     | GCA | 0 | 0 | 0 | 0 | Glu | GAA | 0 | 0 | 0 | 0 |     | GGA | 0  | 0  | 0  | 0  |
|     | GTG | 0 | 0 | 0 | 0 |     | GCG | 0 | 0 | 0 | 0 |     | GAG | 0 | 0 | 0 | 0 |     | GGG | 0  | 0  | 0  | 0  |

Codon position x base (3x4) table for each sequence.

#1: SHI  
position 1: T:0.20000 C:0.34000 A:0.44000 G:0.02000  
position 2: T:0.04000 C:0.08000 A:0.22000 G:0.66000  
position 3: T:0.10000 C:0.34000 A:0.18000 G:0.38000  
Average T:0.11333 C:0.25333 A:0.28000 G:0.35333

#2: ASA  
position 1: T:0.24490 C:0.26531 A:0.46939 G:0.02041  
position 2: T:0.04082 C:0.08163 A:0.16327 G:0.71429  
position 3: T:0.14286 C:0.30612 A:0.14286 G:0.40816  
Average T:0.14286 C:0.21769 A:0.25850 G:0.38095

#3: ATE  
position 1: T:0.22917 C:0.27083 A:0.47917 G:0.02083  
position 2: T:0.04167 C:0.08333 A:0.16667 G:0.70833  
position 3: T:0.12500 C:0.31250 A:0.14583 G:0.41667  
Average T:0.13194 C:0.22222 A:0.26389 G:0.38194

#4: CGL  
position 1: T:0.26531 C:0.24490 A:0.44898 G:0.04082  
position 2: T:0.04082 C:0.06122 A:0.16327 G:0.73469  
position 3: T:0.12245 C:0.32653 A:0.16327 G:0.38776

|             |           |           |           |           |
|-------------|-----------|-----------|-----------|-----------|
| Average     | T:0.14286 | C:0.21088 | A:0.25850 | G:0.38776 |
| #5: CNI     |           |           |           |           |
| position 1: | T:0.22917 | C:0.31250 | A:0.43750 | G:0.02083 |
| position 2: | T:0.04167 | C:0.08333 | A:0.16667 | G:0.70833 |
| position 3: | T:0.14583 | C:0.31250 | A:0.14583 | G:0.39583 |
| Average     | T:0.13889 | C:0.23611 | A:0.25000 | G:0.37500 |
| #6: MAR     |           |           |           |           |
| position 1: | T:0.23529 | C:0.29412 | A:0.45098 | G:0.01961 |
| position 2: | T:0.03922 | C:0.07843 | A:0.15686 | G:0.72549 |
| position 3: | T:0.13725 | C:0.29412 | A:0.15686 | G:0.41176 |
| Average     | T:0.13725 | C:0.22222 | A:0.25490 | G:0.38562 |
| #7: MCA     |           |           |           |           |
| position 1: | T:0.22449 | C:0.30612 | A:0.44898 | G:0.02041 |
| position 2: | T:0.04082 | C:0.08163 | A:0.14286 | G:0.73469 |
| position 3: | T:0.14286 | C:0.30612 | A:0.14286 | G:0.40816 |
| Average     | T:0.13605 | C:0.23129 | A:0.24490 | G:0.38776 |
| #8: MGE     |           |           |           |           |
| position 1: | T:0.23529 | C:0.29412 | A:0.45098 | G:0.01961 |
| position 2: | T:0.03922 | C:0.07843 | A:0.13725 | G:0.74510 |
| position 3: | T:0.13725 | C:0.29412 | A:0.15686 | G:0.41176 |
| Average     | T:0.13725 | C:0.22222 | A:0.24837 | G:0.39216 |
| #9: MAG     |           |           |           |           |
| position 1: | T:0.24490 | C:0.30612 | A:0.42857 | G:0.02041 |
| position 2: | T:0.04082 | C:0.08163 | A:0.14286 | G:0.73469 |
| position 3: | T:0.14286 | C:0.30612 | A:0.14286 | G:0.40816 |
| Average     | T:0.14286 | C:0.23129 | A:0.23810 | G:0.38776 |
| #10: PDU    |           |           |           |           |
| position 1: | T:0.23529 | C:0.29412 | A:0.45098 | G:0.01961 |
| position 2: | T:0.03922 | C:0.07843 | A:0.13725 | G:0.74510 |
| position 3: | T:0.13725 | C:0.29412 | A:0.15686 | G:0.41176 |
| Average     | T:0.13725 | C:0.22222 | A:0.24837 | G:0.39216 |
| #11: PLU    |           |           |           |           |
| position 1: | T:0.23529 | C:0.29412 | A:0.45098 | G:0.01961 |
| position 2: | T:0.03922 | C:0.07843 | A:0.13725 | G:0.74510 |
| position 3: | T:0.13725 | C:0.29412 | A:0.15686 | G:0.41176 |
| Average     | T:0.13725 | C:0.22222 | A:0.24837 | G:0.39216 |
| #12: MAU    |           |           |           |           |
| position 1: | T:0.21569 | C:0.31373 | A:0.45098 | G:0.01961 |
| position 2: | T:0.03922 | C:0.07843 | A:0.17647 | G:0.70588 |
| position 3: | T:0.07843 | C:0.33333 | A:0.17647 | G:0.41176 |
| Average     | T:0.11111 | C:0.24183 | A:0.26797 | G:0.37908 |
| #13: PSU    |           |           |           |           |
| position 1: | T:0.22000 | C:0.32000 | A:0.44000 | G:0.02000 |
| position 2: | T:0.04000 | C:0.08000 | A:0.22000 | G:0.66000 |
| position 3: | T:0.06000 | C:0.40000 | A:0.14000 | G:0.40000 |
| Average     | T:0.10667 | C:0.26667 | A:0.26667 | G:0.36000 |
| #14: PRO    |           |           |           |           |
| position 1: | T:0.22000 | C:0.32000 | A:0.44000 | G:0.02000 |

position 2: T:0.04000 C:0.08000 A:0.22000 G:0.66000  
 position 3: T:0.06000 C:0.40000 A:0.14000 G:0.40000  
 Average T:0.10667 C:0.26667 A:0.26667 G:0.36000

#15: PCM  
 position 1: T:0.22449 C:0.30612 A:0.44898 G:0.02041  
 position 2: T:0.04082 C:0.08163 A:0.20408 G:0.67347  
 position 3: T:0.06122 C:0.38776 A:0.14286 G:0.40816  
 Average T:0.10884 C:0.25850 A:0.26531 G:0.36735

#16: MMU  
 position 1: T:0.19608 C:0.31373 A:0.47059 G:0.01961  
 position 2: T:0.03922 C:0.07843 A:0.21569 G:0.66667  
 position 3: T:0.13725 C:0.31373 A:0.17647 G:0.37255  
 Average T:0.12418 C:0.23529 A:0.28758 G:0.35294

Sums of codon usage counts

|       |     |    |       |     |    |       |     |    |       |     |     |
|-------|-----|----|-------|-----|----|-------|-----|----|-------|-----|-----|
| Phe F | TTT | 0  | Ser S | TCT | 1  | Tyr Y | TAT | 0  | Cys C | TGT | 26  |
|       | TTC | 0  |       | TCC | 30 |       | TAC | 12 |       | TGC | 71  |
| Leu L | TTA | 0  |       | TCA | 18 | *** * | TAA | 0  | *** * | TGA | 0   |
|       | TTG | 10 |       | TCG | 14 |       | TAG | 0  | Trp W | TGG | 0   |
| Leu L | CTT | 0  | Pro P | CCT | 0  | His H | CAT | 27 | Arg R | CGT | 39  |
|       | CTC | 0  |       | CCC | 0  |       | CAC | 71 |       | CGC | 43  |
|       | CTA | 1  |       | CCA | 0  | Gln Q | CAA | 0  |       | CGA | 7   |
|       | CTG | 5  |       | CCG | 0  |       | CAG | 0  |       | CGG | 46  |
| Ile I | ATT | 0  | Thr T | ACT | 0  | Asn N | AAT | 0  | Ser S | AGT | 0   |
|       | ATC | 16 |       | ACC | 0  |       | AAC | 0  |       | AGC | 0   |
|       | ATA | 0  |       | ACA | 0  | Lys K | AAA | 2  | Arg R | AGA | 95  |
| Met M | ATG | 0  |       | ACG | 0  |       | AAG | 26 |       | AGG | 220 |
| Val V | GTT | 0  | Ala A | GCT | 0  | Asp D | GAT | 0  | Gly G | GGT | 0   |
|       | GTC | 0  |       | GCC | 0  |       | GAC | 0  |       | GGC | 17  |
|       | GTA | 0  |       | GCA | 0  | Glu E | GAA | 0  |       | GGA | 0   |
|       | GTG | 0  |       | GCG | 0  |       | GAG | 0  |       | GGG | 0   |

(Ambiguity data are not used in the counts.)

Codon position x base (3x4) table, overall

position 1: T:0.22836 C:0.29987 A:0.45044 G:0.02133  
 position 2: T:0.04015 C:0.07905 A:0.17315 G:0.70765  
 position 3: T:0.11669 C:0.32622 A:0.15433 G:0.40276  
 Average T:0.12840 C:0.23505 A:0.25931 G:0.37725

Codon frequencies under model, for use in evolver (TTT TTC TTA TTG ... GGG):

0.00000000 0.00000000 0.00000000 0.01232779  
 0.00117925 0.03590478 0.02207005 0.01725890  
 0.00000000 0.01436191 0.00000000 0.00000000  
 0.03066038 0.08617148 0.00000000 0.00000000  
 0.00000000 0.00000000 0.00122611 0.00616389  
 0.00000000 0.00000000 0.00000000 0.00000000  
 0.03183962 0.08497465 0.00000000 0.00000000  
 0.05362182 0.06015171 0.01018747 0.06661921

0.00000000 0.01920087 0.00000000 0.00000000  
0.00000000 0.00000000 0.00000000 0.00000000  
0.00000000 0.00000000 0.00245900 0.03214130  
0.00000000 0.00000000 0.11830660 0.27282714  
0.00000000 0.00000000 0.00000000 0.00000000  
0.00000000 0.00000000 0.00000000 0.00000000  
0.00000000 0.00000000 0.00000000 0.00000000  
0.00000000 0.02034604 0.00000000 0.00000000

Nei & Gojobori 1986. dN/dS (dN, dS)  
(Pairwise deletion)  
(Note: This matrix is not used in later ML. analysis.  
Use runmode = -2 for ML pairwise comparison.)

SHI  
ASA 0.1706 (0.0564 0.3308)  
ATE 0.1565 (0.0579 0.3844) 0.0000 (0.0000 0.0299)  
CGL 0.3464 (0.0971 0.2803) 0.2321 (0.0366 0.1579) 0.3001 (0.0375 0.1250)  
CNI 0.1438 (0.0480 0.3336) 0.1401 (0.0279 0.1989) 0.1742 (0.0286 0.1640) 0.6236 (0.0571 0.0915)  
MAR 0.2005 (0.0566 0.2824) 0.2301 (0.0366 0.1589) 0.2976 (0.0375 0.1259) 1.2866 (0.0754 0.0586) 0.9512 (0.0280 0.0294)  
MCA 0.2010 (0.0567 0.2819) 0.2306 (0.0366 0.1586) 0.2982 (0.0375 0.1257) 1.2890 (0.0754 0.0585) 0.9530 (0.0280 0.0294)-1.0000 (0.0181 0.0000)  
MGE 0.2369 (0.0666 0.2811) 0.2919 (0.0460 0.1582) 0.3764 (0.0472 0.1254) 1.4644 (0.0855 0.0584) 1.2829 (0.0376 0.0293)-1.0000 (0.0087 0.0000)-1.0000 (0.0090 0.0000)  
MAG 0.2353 (0.0696 0.2959) 0.2902 (0.0481 0.1857) 0.3759 (0.0493 0.1312) 1.4681 (0.0894 0.0609) 1.2853 (0.0393 0.0385)-1.0000 (0.0091 0.0000)-1.0000 (0.0094 0.0000)-1.0000 (0.0000 0.0000)  
PDU 0.2369 (0.0666 0.2811) 0.2910 (0.0460 0.1582) 0.3764 (0.0472 0.1254) 1.4644 (0.0855 0.0584) 1.2829 (0.0376 0.0293)-1.0000 (0.0087 0.0000)-1.0000 (0.0090 0.0000)-1.0000 (0.0000 0.0000)  
PLU 0.2369 (0.0666 0.2811) 0.2910 (0.0460 0.1582) 0.3764 (0.0472 0.1254) 1.4644 (0.0855 0.0584) 1.2829 (0.0376 0.0293)-1.0000 (0.0087 0.0000)-1.0000 (0.0090 0.0000)-1.0000 (0.0000 0.0000)  
MAU 0.1482 (0.0452 0.3048) 0.0526 (0.0272 0.5173) 0.0594 (0.0279 0.4696) 0.1843 (0.0655 0.3552) 0.0905 (0.0375 0.4142) 0.1287 (0.0461 0.3579) 0.0765 (0.0273 0.3573) 0.1030 (0.0367 0.3562) 0.1020 (0.0383 0.3755) 0.1030 (0.0367 0.3562) 0.1030 (0.0367 0.3562)  
PSU 0.1088 (0.0183 0.1680) 0.1962 (0.0551 0.2810) 0.2326 (0.0565 0.2429) 0.4033 (0.0948 0.2350) 0.1654 (0.0469 0.2832) 0.2337 (0.0553 0.2367) 0.2342 (0.0553 0.2363) 0.2760 (0.0650 0.2356) 0.2745 (0.0679 0.2475) 0.2760 (0.0650 0.2356) 0.2760 (0.0650 0.2356) 0.2828 (0.0458 0.1618)  
PRO 0.1106 (0.0183 0.1658) 0.1512 (0.0553 0.3600) 0.1745 (0.0567 0.3250) 0.3238 (0.0751 0.2320) 0.1333 (0.0374 0.2802) 0.2377 (0.0555 0.2336) 0.2382 (0.0555 0.2332) 0.2806 (0.0653 0.2326) 0.2793 (0.0692 0.2441) 0.2806 (0.0653 0.2326) 0.2806 (0.0653 0.2326) 0.2874 (0.0459 0.1598) 0.2894 (0.0175 0.0605)  
PCM 0.1088 (0.0183 0.1680) 0.1962 (0.0551 0.2810) 0.2326 (0.0565 0.2429) 0.4033 (0.0948 0.2350) 0.1654 (0.0469 0.2832) 0.2337 (0.0553 0.2367) 0.2342 (0.0553 0.2363) 0.2760 (0.0650 0.2356) 0.2745 (0.0679 0.2475) 0.2760 (0.0650 0.2356) 0.2760 (0.0650 0.2356) 0.2828 (0.0458 0.1618)-1.0000 (0.0000 0.0000) 0.2935 (0.0179 0.0611)  
MMU 0.0433 (0.0176 0.4062) 0.0665 (0.0550 0.8274) 0.0743 (0.0564 0.7587) 0.1618 (0.0946 0.5848) 0.0863 (0.0468 0.5417) 0.1170 (0.0552 0.4717) 0.1173 (0.0552 0.4707) 0.1383 (0.0649 0.4692) 0.1362 (0.0678 0.4976) 0.1383 (0.0649 0.4692) 0.1383 (0.0649 0.4692) 0.1006 (0.0441 0.4381) 0.0536 (0.0178 0.3327) 0.0631 (0.0179 0.2835) 0.0536 (0.0178 0.3327)

TREE # 1: (16, (1, (((((13, 15), 14), 12), ((2, 3), (4, (5, (7, ((9, 6), (8, (10, 11)))))))))); MP score: -1  
This is a rooted tree. Please check!  
check convergence.  
lnL(ntime: 30 np: 35): -414.618395 +0.000000  
17..16 17..18 18..1 18..19 19..20 20..21 21..22 22..13 22..15 21..14 20..12 19..23 23..24 24..2 24..3 23..25 25..4 25..26 26..5 26..27 27..7 27..28 28..29 29..9 29..6  
28..30 30..8 30..31 31..10 31..11  
0.104932 0.097778 0.100033 0.018530 0.032202 0.000004 0.040977 0.000004 0.000004 0.041150 0.187552 0.225321 0.069806 0.018542 0.019550 0.000004 0.111088 0.057084 0.063566 0.040867 0.000004 0.040059 0.000004 0.000004 0.018840  
0.000004 0.000004 0.000004 0.000004 0.000004 2.491783 0.331447 0.000000 0.000001 1.740981

Note: Branch length is defined as number of nucleotide substitutions per codon (not per nucleotide site).

tree length = 1.28792

(16: 0.104932, (1: 0.100033, (((((13: 0.000004, 15: 0.000004): 0.040977, 14: 0.041150): 0.000004, 12: 0.187552): 0.032202, ((2: 0.018542, 3: 0.019550): 0.069806, (4: 0.111088, (5: 0.063566, (7: 0.000004, ((9: 0.000004, 6: 0.018840): 0.000004, (8: 0.000004, (10: 0.000004, 11: 0.000004): 0.000004): 0.000004): 0.040059): 0.040867): 0.057084): 0.000004): 0.225321): 0.018530): 0.097778);

(MMU: 0.104932, (SHI: 0.100033, (((PSU: 0.000004, PCM: 0.000004): 0.040977, PRO: 0.041150): 0.000004, MAU: 0.187552): 0.032202, ((ASA: 0.018542, ATE: 0.019550): 0.069806, (CGL: 0.111088, (CNI: 0.063566, (MCA: 0.000004, ((MAG: 0.000004, MAR: 0.018840): 0.000004, (MGE: 0.000004, (PDU: 0.000004, PLU: 0.000004): 0.000004): 0.000004): 0.040059): 0.040867): 0.057084): 0.000004): 0.225321): 0.018530): 0.097778);

Detailed output identifying parameters

kappa (ts/tv) = 2.49178

dN/dS (w) for site classes (K=3)

p: 0.33145 0.00000 0.66855  
w: 0.00000 1.00000 1.74098

dN & dS for each branch

| branch | t     | N    | S     | dN/dS  | dN     | dS     | N*dN | S*dS |
|--------|-------|------|-------|--------|--------|--------|------|------|
| 17..16 | 0.105 | 55.6 | 106.4 | 1.1639 | 0.0385 | 0.0331 | 2.1  | 3.5  |
| 17..18 | 0.098 | 55.6 | 106.4 | 1.1639 | 0.0359 | 0.0309 | 2.0  | 3.3  |
| 18..1  | 0.100 | 55.6 | 106.4 | 1.1639 | 0.0367 | 0.0316 | 2.0  | 3.4  |
| 18..19 | 0.019 | 55.6 | 106.4 | 1.1639 | 0.0068 | 0.0058 | 0.4  | 0.6  |
| 19..20 | 0.032 | 55.6 | 106.4 | 1.1639 | 0.0118 | 0.0102 | 0.7  | 1.1  |
| 20..21 | 0.000 | 55.6 | 106.4 | 1.1639 | 0.0000 | 0.0000 | 0.0  | 0.0  |
| 21..22 | 0.041 | 55.6 | 106.4 | 1.1639 | 0.0151 | 0.0129 | 0.8  | 1.4  |
| 22..13 | 0.000 | 55.6 | 106.4 | 1.1639 | 0.0000 | 0.0000 | 0.0  | 0.0  |
| 22..15 | 0.000 | 55.6 | 106.4 | 1.1639 | 0.0000 | 0.0000 | 0.0  | 0.0  |
| 21..14 | 0.041 | 55.6 | 106.4 | 1.1639 | 0.0151 | 0.0130 | 0.8  | 1.4  |
| 20..12 | 0.188 | 55.6 | 106.4 | 1.1639 | 0.0689 | 0.0592 | 3.8  | 6.3  |
| 19..23 | 0.225 | 55.6 | 106.4 | 1.1639 | 0.0828 | 0.0711 | 4.6  | 7.6  |
| 23..24 | 0.070 | 55.6 | 106.4 | 1.1639 | 0.0256 | 0.0220 | 1.4  | 2.3  |
| 24..2  | 0.019 | 55.6 | 106.4 | 1.1639 | 0.0068 | 0.0059 | 0.4  | 0.6  |
| 24..3  | 0.020 | 55.6 | 106.4 | 1.1639 | 0.0072 | 0.0062 | 0.4  | 0.7  |
| 23..25 | 0.000 | 55.6 | 106.4 | 1.1639 | 0.0000 | 0.0000 | 0.0  | 0.0  |
| 25..4  | 0.111 | 55.6 | 106.4 | 1.1639 | 0.0408 | 0.0351 | 2.3  | 3.7  |
| 25..26 | 0.057 | 55.6 | 106.4 | 1.1639 | 0.0210 | 0.0180 | 1.2  | 1.9  |
| 26..5  | 0.064 | 55.6 | 106.4 | 1.1639 | 0.0233 | 0.0201 | 1.3  | 2.1  |
| 26..27 | 0.041 | 55.6 | 106.4 | 1.1639 | 0.0150 | 0.0129 | 0.8  | 1.4  |
| 27..7  | 0.000 | 55.6 | 106.4 | 1.1639 | 0.0000 | 0.0000 | 0.0  | 0.0  |
| 27..28 | 0.040 | 55.6 | 106.4 | 1.1639 | 0.0147 | 0.0126 | 0.8  | 1.3  |
| 28..29 | 0.000 | 55.6 | 106.4 | 1.1639 | 0.0000 | 0.0000 | 0.0  | 0.0  |
| 29..9  | 0.000 | 55.6 | 106.4 | 1.1639 | 0.0000 | 0.0000 | 0.0  | 0.0  |
| 29..6  | 0.019 | 55.6 | 106.4 | 1.1639 | 0.0069 | 0.0059 | 0.4  | 0.6  |
| 28..30 | 0.000 | 55.6 | 106.4 | 1.1639 | 0.0000 | 0.0000 | 0.0  | 0.0  |
| 30..8  | 0.000 | 55.6 | 106.4 | 1.1639 | 0.0000 | 0.0000 | 0.0  | 0.0  |
| 30..31 | 0.000 | 55.6 | 106.4 | 1.1639 | 0.0000 | 0.0000 | 0.0  | 0.0  |
| 31..10 | 0.000 | 55.6 | 106.4 | 1.1639 | 0.0000 | 0.0000 | 0.0  | 0.0  |
| 31..11 | 0.000 | 55.6 | 106.4 | 1.1639 | 0.0000 | 0.0000 | 0.0  | 0.0  |

Naive Empirical Bayes (NEB) analysis  
Positively selected sites (\*: P>95%; \*\*: P>99%)  
(amino acids refer to 1st sequence: SHI)

|      | Pr(w>1) | post mean +- SE for w |
|------|---------|-----------------------|
| 1 S  | 0.633   | 1.103                 |
| 3 R  | 1.000** | 1.741                 |
| 4 R  | 1.000** | 1.741                 |
| 5 L  | 0.607   | 1.056                 |
| 6 H  | 1.000** | 1.741                 |
| 7 R  | 0.656   | 1.142                 |
| 8 I  | 0.669   | 1.164                 |
| 10 K | 1.000** | 1.741                 |
| 11 R | 0.630   | 1.097                 |
| 13 R | 0.657   | 1.144                 |
| 14 S | 0.669   | 1.164                 |
| 16 R | 0.593   | 1.033                 |
| 17 R | 0.589   | 1.025                 |
| 18 R | 0.660   | 1.148                 |
| 19 R | 0.646   | 1.125                 |
| 20 R | 0.662   | 1.152                 |
| 21 H | 1.000** | 1.741                 |

|      |         |       |
|------|---------|-------|
| 22 S | 0.546   | 0.951 |
| 24 R | 1.000** | 1.741 |
| 26 R | 0.589   | 1.025 |
| 27 R | 0.593   | 1.033 |
| 28 R | 0.661   | 1.152 |
| 29 H | 0.506   | 0.881 |
| 31 R | 0.657   | 1.144 |
| 33 C | 1.000** | 1.741 |
| 34 K | 1.000** | 1.741 |
| 35 R | 0.662   | 1.152 |
| 36 S | 1.000** | 1.741 |
| 37 R | 0.646   | 1.124 |
| 38 - | 0.665   | 1.157 |
| 39 * | 0.597   | 1.039 |
| 40 R | 0.589   | 1.025 |
| 41 R | 0.589   | 1.025 |
| 42 R | 0.662   | 1.152 |
| 44 R | 0.589   | 1.025 |
| 46 R | 0.592   | 1.031 |
| 47 K | 1.000** | 1.741 |
| 48 C | 0.504   | 0.878 |
| 49 R | 0.589   | 1.025 |
| 50 R | 0.582   | 1.014 |
| 51 H | 1.000** | 1.741 |
| 52 H | 1.000** | 1.741 |
| 53 H | 1.000** | 1.741 |
| 54 - | 0.655   | 1.141 |

Bayes Empirical Bayes (BEB) analysis (Yang, Wong & Nielsen 2005. Mol. Biol. Evol. 22:1107-1118)  
 Positively selected sites (\*: P>95%; \*\*: P>99%)  
 (amino acids refer to 1st sequence: SHI)

|      | Pr(w>1) | post mean +- SE for w |
|------|---------|-----------------------|
| 6 H  | 0.601   | 2.249 +- 1.770        |
| 52 H | 0.632   | 2.397 +- 1.905        |

The grid (see ternary graph for p0-p1)

|     |       |       |       |       |       |       |       |       |       |        |
|-----|-------|-------|-------|-------|-------|-------|-------|-------|-------|--------|
| w0: | 0.050 | 0.150 | 0.250 | 0.350 | 0.450 | 0.550 | 0.650 | 0.750 | 0.850 | 0.950  |
| w2: | 1.500 | 2.500 | 3.500 | 4.500 | 5.500 | 6.500 | 7.500 | 8.500 | 9.500 | 10.500 |

Posterior on the grid

|     |       |       |       |       |       |       |       |       |       |       |
|-----|-------|-------|-------|-------|-------|-------|-------|-------|-------|-------|
| w0: | 0.099 | 0.096 | 0.093 | 0.092 | 0.093 | 0.096 | 0.100 | 0.105 | 0.110 | 0.113 |
| w2: | 0.300 | 0.255 | 0.148 | 0.091 | 0.062 | 0.045 | 0.034 | 0.026 | 0.021 | 0.018 |

Posterior for p0-p1 (see the ternary graph)

|                                                       |
|-------------------------------------------------------|
| 0.025                                                 |
| 0.018 0.023 0.024                                     |
| 0.012 0.016 0.019 0.023 0.021                         |
| 0.008 0.011 0.014 0.017 0.019 0.020 0.017             |
| 0.006 0.008 0.010 0.013 0.014 0.017 0.017 0.017 0.013 |



0.005 0.006 0.008 0.009 0.011 0.013 0.014 0.015 0.014 0.013 0.010  
0.004 0.005 0.006 0.007 0.009 0.010 0.011 0.012 0.012 0.013 0.011 0.010 0.008  
0.003 0.004 0.005 0.006 0.007 0.008 0.009 0.010 0.010 0.011 0.010 0.010 0.009 0.008 0.007  
0.003 0.004 0.005 0.005 0.006 0.007 0.008 0.009 0.009 0.009 0.009 0.009 0.008 0.008 0.008 0.007 0.006  
0.002 0.003 0.004 0.005 0.006 0.006 0.007 0.008 0.008 0.008 0.008 0.008 0.007 0.007 0.007 0.007 0.006 0.006 0.005

sum of density on p0-p1 = 1.000000

Time used: 1:52
